1 **Modeling the short-term dynamics of *in vivo* excitatory spike transmission**

2 Abed Ghanbari<sup>1</sup>, Naixin Ren<sup>2</sup>, Christian Keine<sup>3</sup>, Carl Stoelzel<sup>2</sup>, Bernhard Englitz<sup>4</sup>, Harvey A.  
3 Swadlow<sup>2</sup>, and Ian H. Stevenson<sup>1,2</sup>

4 <sup>1</sup> University of Connecticut, Department of Biomedical Engineering

5 <sup>2</sup> University of Connecticut, Department of Psychological Sciences

6 <sup>3</sup> Carver College of Medicine, Iowa Neuroscience Institute, Department of Anatomy and Cell Biology,

7 University of Iowa

8 <sup>4</sup> Radboud University, Donders Institute for Brain, Cognition and Behavior, Department of

9 Neurophysiology

10

11 Corresponding author: [ian.stevenson@uconn.edu](mailto:ian.stevenson@uconn.edu)

12

13

## 14 **Abstract (250 words)**

15 Information transmission in neural networks is influenced by both short-term synaptic plasticity  
16 (STP) as well as non-synaptic factors, such as after-hyperpolarization currents and changes in  
17 excitability. Although these effects have been widely characterized *in vitro* using intracellular  
18 recordings, how they interact *in vivo* is unclear. Here we develop a statistical model of the short-  
19 term dynamics of spike transmission that aims to disentangle the contributions of synaptic and  
20 non-synaptic effects based only on observed pre- and postsynaptic spiking. The model includes a  
21 dynamic functional connection with short-term plasticity as well as effects due to the recent history  
22 of postsynaptic spiking and slow changes in postsynaptic excitability. Using paired spike  
23 recordings, we find that the model accurately describes the short-term dynamics of *in vivo* spike  
24 transmission at a diverse set of identified and putative excitatory synapses, including a  
25 thalamothalamic connection in mouse, a thalamocortical connection in a female rabbit, and an  
26 auditory brainstem synapse in a female gerbil. We illustrate the utility of this modeling approach  
27 by showing how the spike transmission patterns captured by the model may be sufficient to account  
28 for stimulus-dependent differences in spike transmission in the auditory brainstem (endbulb of  
29 Held). Finally, we apply this model to large-scale multi-electrode recordings to illustrate how such  
30 an approach has the potential to reveal cell-type specific differences in spike transmission *in vivo*.  
31 Although short-term synaptic plasticity parameters estimated from ongoing pre- and postsynaptic  
32 spiking are highly uncertain, our results are partially consistent with previous intracellular  
33 observations in these synapses.

## 34 **Significance Statement (120 words)**

35 Although synaptic dynamics have been extensively studied and modeled using intracellular  
36 recordings of post-synaptic currents and potentials, inferring synaptic effects from extracellular  
37 spiking is challenging. Whether or not a synaptic current contributes to postsynaptic spiking  
38 depends not only on the amplitude of the current, but also on many other factors, including the  
39 activity of other, typically unobserved, synapses, the overall excitability of the postsynaptic  
40 neuron, and how recently the postsynaptic neuron has spiked. Here we developed a model that,  
41 using only observations of pre- and postsynaptic spiking, aims to describe the dynamics of *in vivo*  
42 spike transmission by modeling both short-term synaptic plasticity and non-synaptic effects. This  
43 approach may provide a novel description of fast, structured changes in spike transmission.

## 44 **Introduction (650 words)**

45 In response to a presynaptic input, the amplitudes of elicited postsynaptic potentials (PSPs) can  
46 increase or decrease dramatically due to short-term synaptic plasticity (Zucker and Regehr, 2002;  
47 Regehr, 2012). The probability that a postsynaptic neuron spikes in response to a presynaptic spike  
48 can also increase or decrease depending on the recent history of pre- and postsynaptic activity

49 (Usrey et al., 2000; Swadlow and Gusev, 2001). Although many models exist to describe  
50 intracellular observations of short-term synaptic plasticity (Costa et al., 2013; Hennig, 2013; Barri  
51 et al., 2016; Bird et al., 2016), most models of *functional* connections between neurons based on  
52 extracellular spike observations assume that connections are fixed over time (Truccolo et al., 2005;  
53 Pillow et al., 2008). Unlike intracellular PSP observations, where the amplitude of each individual  
54 presynaptic spike can be measured (subject to noise), extracellular spike observations are sparse,  
55 typically all-or-none binary events. Modeling dynamic, functional connections from spike  
56 observations, especially in the presence of uncontrolled, ongoing neural activity, presents a major  
57 statistical challenge (Ghanbari et al., 2017). Here we further develop a model-based approach that,  
58 given only pre- and postsynaptic spike observations, estimates the contributions of short-term  
59 synaptic plasticity and several non-synaptic factors to the probability of spike transmission.

60 Traditionally, the influence of presynaptic spikes on postsynaptic spiking is measured using cross-  
61 correlation (Perkel et al., 1967; Fetz et al., 1991; Csicsvari et al., 1998; Barthó et al., 2004). If two  
62 neurons are monosynaptically connected, the probability of the postsynaptic neuron spiking will  
63 briefly increase or decrease following a presynaptic spike, which appears as a fast-onset, short-  
64 latency peak or trough in the cross-correlation, depending on whether the synapse is excitatory or  
65 inhibitory (Perkel et al., 1967; Barthó et al., 2004). Just as synaptic potentials depress or facilitate  
66 due to short-term synaptic plasticity, this spike transmission probability might also depend on the  
67 recent history of presynaptic activity. By subdividing cross-correlograms to characterize the  
68 specific effects of different presynaptic spike patterns, previous studies have found that certain,  
69 putative synaptic connections show reduced spike transmission probability following recent  
70 presynaptic spikes (Swadlow and Gusev, 2001; English et al., 2017), while others show increased  
71 probability (Usrey et al., 2000), as might be expected of depressing or facilitating synapses,  
72 respectively.

73 Here, rather than subdividing correlograms, we use a likelihood-based modeling approach that  
74 extends previous static models of functional connectivity (Harris et al., 2003; Pillow et al., 2008;  
75 Stevenson et al., 2008). This dynamic model describes not only the sign and strength of synaptic  
76 connections, but also whether the dynamics are depressing or facilitating. In addition to describing  
77 differences in responses to specific presynaptic spike patterns, the model-based approach also  
78 allows us to predict how the postsynaptic neuron will respond to arbitrary patterns of presynaptic  
79 activity. In previous work, we evaluated this type of dynamical functional connectivity model on  
80 simulated and *in vitro* experiments where the ground-truth dynamics were known (Ghanbari et al.,  
81 2017). These results demonstrated that, at least in a controlled setting, short-term synaptic  
82 plasticity can be inferred from spike observations, even in the presence of sources of error, such  
83 as spike sorting errors, stochastic vesicle release, and common input from unobserved neurons.  
84 Here we build on this model and examine how well it can account for excitatory spike transmission  
85 dynamics observed *in vivo* where the true synaptic currents are unknown.

86 A key element of our dynamical functional connectivity model is the inclusion of both synaptic  
87 and non-synaptic contributions to spike transmission. For each individual presynaptic spike, our  
88 model predicts postsynaptic spiking by taking into account synaptic coupling with STP, synaptic  
89 summation, post-spike history effects, and slow fluctuations of excitability. Although these effects  
90 do not include all factors that may influence spiking statistics (Herz et al., 2006), together they can  
91 account for wide variety of phenomena, including subthreshold membrane integration (Carandini  
92 et al., 2007) and slower fluctuations in the overall excitability of the postsynaptic neuron, such as  
93 observed during neuromodulation (Henze and Buzsáki, 2001). The interaction between synaptic  
94 and non-synaptic effects, as well as the degree to which each factor contributes is likely to lead to  
95 diverse patterns of spike transmission. Here we show how models of dynamical functional  
96 connectivity with short-term synaptic plasticity can capture these patterns of spike transmission  
97 and disentangle the multiple factors that shape postsynaptic response.

## 98 **Material and methods**

### 99 **Neural Data**

100 All data analyzed here were obtained from previous studies (see below). Animal use procedures  
101 were approved by the institutional animal care and use committees at University of Connecticut  
102 (VB-Barrel), University of Leipzig (ANF-SBC), or University College London (MEA),  
103 respectively, and conform to the principles outlined in the Guide for the Care and Use of  
104 Laboratory Animals (National Institutes of Health publication no. 86-23, revised 1985).

105 To illustrate how synaptic dynamics can be estimated from spikes, we first examined a set of three  
106 strong putative or identified synapses with diverse spike transmission probability patterns: (i) a  
107 local, excitatory connection from one neuron in mouse thalamus to another detected from a larger  
108 multi-electrode array (MEA) recording, (ii) a ventrobasal thalamus projection to primary  
109 somatosensory cortex (VB – Barrel) in a rabbit, and (iii) an *in vivo* loose-patch (juxtacellular)  
110 recording of an auditory nerve projection onto a spherical bushy cell (ANF-SBC) in the auditory  
111 brainstem of a gerbil. We then use this auditory brainstem connection to explore how synaptic  
112 transmission probability depends on the stimulus and compare the results with a model without  
113 short-term synaptic plasticity. Next, we applied our model more generally to analyze a large  
114 sample of putative synaptic connections recorded from the MEA dataset. The data from these three  
115 identified strong synapses and the MEA data have been collected from different species, regions,  
116 cell-types, under different stimulation and show a diverse pattern of postsynaptic spiking  
117 probability. In all cases we deduce short-term synaptic dynamics on the basis of only pre- and  
118 postsynaptic spike observations.

119 For the first putative synapse, we use *in vivo* data from simultaneous extracellular recordings in  
120 ventrobasal (VB) thalamic barreloids and topographically aligned, somatosensory cortical barrel  
121 columns (VB-Barrel) in awake, unanesthetized, adult rabbits. Detailed surgical and physiological

122 methods have been described previously (Swadlow and Gusev, 2002). Spike-triggered averages  
123 of the cortical spikes following spiking of the VB neuron was used to identify connected S1  
124 neurons. Based on the presence of high frequency discharge (3+ spikes, > 600 Hz) following  
125 electrical stimulation of the thalamus, and narrow spike waveforms, the S1 neuron in this recording  
126 was identified as a putative inhibitory neuron (Kawaguchi, 2001). These recordings identified  
127 several putative thalamocortical projections. The putative synapse that we model here is  
128 particularly clear, with 68,345 pre- and 128,096 postsynaptic spikes recorded over the course of  
129 92 minutes of spontaneous activity and has been previously studied in (Swadlow and Gusev, 2001;  
130 Swadlow, 2002).

131 For the second synapse, we examined *in vivo* loose-patch recordings at the Endbulb of Held in  
132 young adult female gerbils. Detailed surgical and physiological methods have been previously  
133 described (Keine et al., 2017). Briefly, the glass electrode was positioned in the anterior portion of  
134 the ventral cochlear nucleus (AVCN) and single-units were recorded during varying acoustic  
135 stimulation. Single units were classified when recording a positive action potential amplitude of at  
136 least 2 mV and showing the characteristic complex waveform identifying them as large spherical  
137 bushy cells (SBC) of the rostral AVCN. This recording included a mixture of juxtacellular  
138 waveforms: an isolated excitatory PSP (EPSP) or an EPSP followed by a postsynaptic action  
139 potential. For both cases the timing of EPSPs and spikes and rising slope of the EPSPs were  
140 extracted. The timing and slope of the EPSPs were identified using a slope threshold for the rising  
141 part of EPSPs as previously described (Keine et al., 2016). We then modeled spike transmission  
142 probability patterns for two recordings: (i) during randomized pure tone acoustic stimulation and  
143 (ii) during multiple stimuli, i.e. randomized frequency-level pure tone stimulation interspaced with  
144 spontaneous activity, natural sounds, and also during spontaneous activity. Using this second  
145 dataset, we characterized how variable presynaptic spike patterns evoked by different stimuli  
146 affected the patterns of spike transmission at the same synapse.

147 We also use MEA spiking data to study the factors shaping spike transmission probability patterns  
148 in a large-scale recording with multiple cell-types. Here we use a previously collected, publicly  
149 available recording from the Cortex Lab at UCL (Jun et al., 2017; Mora Lopez et al., 2017) with  
150 data from two Neuropixels electrode arrays recorded simultaneously, each with 960 sites (384  
151 active) with lengths of 10-mm and spacing of  $70 \times 20\text{-}\mu\text{m}$  (<http://data.cortexlab.net/dualPhase3/>).  
152 The two electrode arrays span multiple brain areas and ~90 min of data was collected in an awake,  
153 head-fixed mouse on a rotating rubber wheel during visual stimulus presentations. Spikes were  
154 automatically detected and sorted using Kilosort (Pachitariu et al., 2016) on the broadband (0.3–  
155 10 kHz) signal and then manually curated. If two clusters of spikes had similar waveforms, cross-  
156 correlogram features, and spike amplitudes, they were merged into a single cluster and assigned  
157 to a single neuron. In total, 831 well-isolated single neurons were identified from the two probes  
158 in several different brain areas: visual cortex (n=74), hippocampus (n=64), thalamus (n=244),

159 motor cortex (n=243), and striatum (n=200). Due to the large number of simultaneously recorded  
160 neurons in this dataset, there are many potential synapses ( $\sim 831^2$ ).

## 161 **Synapse Detection**

162 To identify putative monosynaptic connections between well-isolated single neurons, we looked  
163 for specific patterns in the cross-correlograms (Moore et al., 1970). If two neurons are  
164 monosynaptically connected, the probability of postsynaptic spiking increases/decreases rapidly  
165 following a presynaptic spike. In spiking data, this rapid, transient change can be seen in cross-  
166 correlograms as an asymmetric bump/dip in the number of postsynaptic spikes following  
167 presynaptic spikes (Barthó et al., 2004). For each connection we calculated the cross-correlogram  
168 in a 5 ms window before and after presynaptic spikes with bin-size of 0.1 ms. To avoid aliasing in  
169 the cross-correlograms, we added a small, random shift to each postsynaptic spike drawn  
170 uniformly between  $-\Delta t/2$  and  $\Delta t/2$  where  $\Delta t$  is the spike time resolution (0.01 ms in most cases).  
171 Here we used a model-based approach using the cross-correlograms to decide whether two  
172 synapses are monosynaptically connected. To fit the cross-correlogram we used a baseline rate  $\mu$ ,  
173 a linear combination of B-spline bases  $\mathbf{B}(t)$ , and a weighted alpha function to model the synapse,  
174  $w \alpha(t)$ , all passed through an output nonlinearity;  $\lambda(t) = \exp(\mu + \mathbf{r}\mathbf{B}(t) + w \alpha(t))$ . The alpha  
175 function,  $\alpha(t) = (t - t_d)/\tau_\alpha \exp(1 - (t - t_d)/\tau_\alpha)$ , describes the shape of the synaptic potential  
176 where  $t_d$  is the synaptic delay and  $\tau_\alpha$  is the synaptic time-constant (Carandini et al., 2007). For  
177 individual connections, we estimate these parameters by maximizing the penalized Poisson log-  
178 likelihood  $l(\mu, \mathbf{r}, w, t_d, \tau_\alpha) = \sum y_i \log \lambda_i - \sum \lambda_i + \epsilon \|\mathbf{r}\|_2$  where  $y_i$  is the number of postsynaptic  
179 spikes observed in the  $i$ -th bin of the correlogram and  $\|\mathbf{r}\|_2$  regularizes the model to penalize B-  
180 spline bases for capturing sharp increases in the cross-correlogram.  $\epsilon$  is a regularization hyper-  
181 parameter which we set to 1 based on manual search. Due to the parameterization of  $\alpha(t)$ , the log-  
182 likelihood is not concave. However, since the gradient of the log-likelihood can be calculated  
183 analytically, we efficiently optimize the likelihood using a gradient-based pseudo-Newton method  
184 (LBFGS) (Boyd and Vandenberghe, 2004). During the optimization, the delay and time-constant  
185 parameters are log-transformed, allowing us to use unconstrained optimization, even though they  
186 are strictly positive. We used random restarts to avoid local maxima. To identify putative  
187 monosynaptic connections in the large-scale multi-electrode array data, we compared this model  
188 with a smooth model with slow changes in cross-correlogram and without the synapse,  $\lambda_0(t) =$   
189  $\exp(\mu' + \mathbf{r}'\mathbf{B}(t))$ , using the log-likelihood ratio (LLR) test between our full model with synapse  
190 and the nested smooth model. Since low values of the likelihood ratio mean that the observed result  
191 was better explained with full model as compared to the smooth model, we then visually screened  
192 pair-wise connections with lowest ratios (LLR < -6) compared to the null model to find putative  
193 synapses. Out of  $\sim 831^2$  possible connections in this dataset we find  $\sim 200$  putative synapses  
194 (0.03%). We handpicked a strong putative synapse between two thalamic neurons to study its  
195 efficacy pattern in detail alongside the VB-Barrel and ANF-SBC synapses.



196 In addition to this single strong synapse, we also categorize putative pre- and postsynaptic cell  
197 types for the connections detected in the MEA dataset. For this purpose, we assessed single units  
198 based on their cross-correlograms, firing rates, and spike waveforms. We categorized units as  
199 excitatory or inhibitory if, in accordance with Dale’s law, all outgoing cross-correlograms showed  
200 transient, short-latency (<4ms) increase/decrease in spiking probability. We then looked into  
201 identified inhibitory neurons and categorized them into to putative fast-spiking (FS) and regular-  
202 spiking (RS) inhibitory neurons. Using these putative Excitatory-FS and Excitatory-RS synapses,  
203 we then examine how the spike transmission patterns differ for these two subtypes of inhibitory  
204 neurons.

### 205 **Extending a Generalized Linear Model to Account for Short-term Plasticity (TM-GLM)**

206 Short-term synaptic plasticity causes the amplitude of postsynaptic potentials (PSP) to vary over  
207 time depending on the dynamics of synaptic resources and utilization and can be modeled using  
208 the pattern of presynaptic spiking (Markram et al., 1998; Tsodyks et al., 1998). However, changes  
209 in the overall postsynaptic spiking probability cannot be uniquely attributed to changes in  
210 amplitudes of postsynaptic potentials. To accurately describe the dynamics of spike transmission,  
211 we also need to account for the membrane potential summation, the excitability of the postsynaptic  
212 neuron (e.g. slow changes in the presynaptic firing rate) and the dynamics of postsynaptic spiking  
213 (e.g. refractory period, after hyperpolarization current). We developed an extension of a  
214 generalized linear model, which we call a TM-GLM to describe each of these effects. Concretely,  
215 the probability of a postsynaptic spike shortly after each presynaptic spike accounts for the full  
216 sequence of previous presynaptic spiking and the recent history of postsynaptic spiking. We define  
217 the conditional intensity of the postsynaptic neuron after the  $i$ -th presynaptic spike,  $t_s^{(i)}$ , so that the  
218 probability of observing a postsynaptic spike in the  $j$ -th time bin after the  $i$ -th presynaptic spike is  
219 given as:

$$220 \lambda_i(t_j) = \sigma \left( \beta_0 + \mathbf{X}_c(t_s^{(i)})\boldsymbol{\beta}_c + \sum_{t_r^{(l)} < t_s^{(i)}} \mathbf{X}_h(t_s^{(i)} - t_r^{(l)})\boldsymbol{\beta}_h + A_s w_i \alpha(t_j) \right)$$

221 where  $t_r^{(l)}$  are the postsynaptic spike times preceding  $t_s^{(i)}$ . For each presynaptic spike, our model  
222 decomposes the firing rate of the postsynaptic neuron into four effects: a baseline firing rate,  $\beta_0$ ,  
223 slow fluctuations in postsynaptic firing rate  $\mathbf{X}_c\boldsymbol{\beta}_c$ , history effects from the recent postsynaptic  
224 spikes (prior to  $t_s^{(i)}$ ),  $\mathbf{X}_h\boldsymbol{\beta}_h$ , and a time-varying coupling effect from the presynaptic input,  
225  $A_s w \alpha(t)$  (Fig. 1).

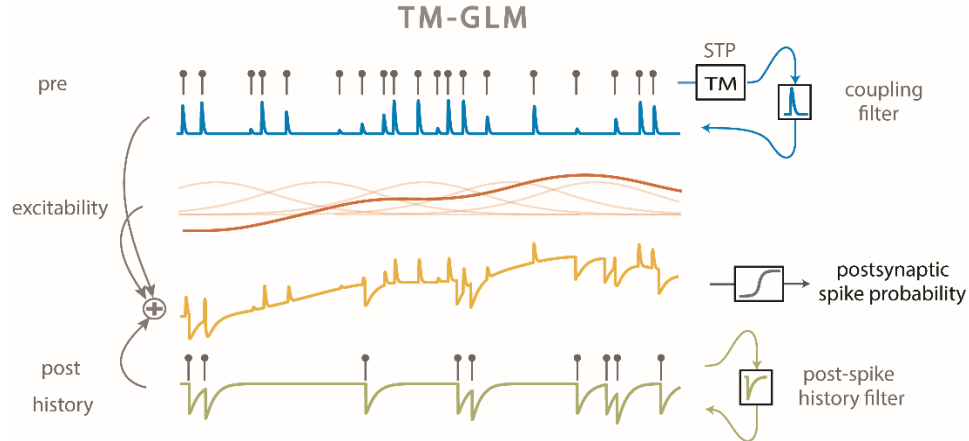

226  
 227 **Fig. 1: TM-GLM.** Postsynaptic spiking probability before passing the spiking nonlinearity  
 228 (yellow) changes as a linear combination of presynaptic coupling term with STP dynamics (blue),  
 229 postsynaptic spiking history (green), the postsynaptic excitability (red). Transparent red curves  
 230 show the bases of slow changes in postsynaptic probability at presynaptic spike times ( $X_c$ ).

231 Here we model slow fluctuations in the postsynaptic rate  $\mathbf{X}_c \beta_c$  with a linear combination of B-  
 232 splines with equally spaced knots every 50 seconds of recording time. In the history term, splines  
 233 ( $\mathbf{X}_h$ ) span a period of 10 ms prior to each presynaptic spike with 4 logarithmically-spaced knots.  
 234 By scaling  $\alpha(t_j)$  with a multiplicative factor,  $w_i$ , the strength of a synapse can vary over time and,  
 235 in this case, depends on the detailed sequence of presynaptic spiking and their corresponding inter-  
 236 spike intervals.  $A_s$  is the magnitude of the synaptic strength. In this case we use a model for short-  
 237 term synaptic plasticity that allows both depression (where the  $w_i$  decreases for shorter presynaptic  
 238 ISIs) and facilitation (where the  $w_i$  increases for shorter presynaptic ISIs), and incorporates  
 239 membrane summation. To model these effects,  $w_i$  is determined by a nonlinear dynamical system  
 240 based on the Tsodyks and Markram (TM) model (Tsodyks and Markram, 1997; Markram et al.,  
 241 1998) where:  $w_i = w_{i-1} \exp\left(-\frac{t_s^{(i)} - t_s^{(i-1)}}{\tau_s}\right) \pi_i + R_i u_i$ , where  $\tau_s$  is the membrane time-constant  
 242 and the first term of the equation describes how postsynaptic membrane potential summation  
 243 increases the probability of postsynaptic spiking. This membrane summation will be ignored if  
 244 there is a postsynaptic spike:  $\pi_i = \begin{cases} 0 & \text{if } t_s^{(i-1)} < t_r^{(i-1)} < t_s^{(i)} \\ 1 & \text{otherwise} \end{cases}$ . In the second term of  
 245 this equation,  $R$  represents the dynamics of resources and  $u$  describes their utilization.

$$246 \quad R_i = 1 - [1 - R_{i-1}(1 - u_{i-1})] \exp\left(-\frac{t_s^{(i)} - t_s^{(i-1)}}{\tau_d}\right)$$

$$247 \quad u_i = U + [u_{i-1} + f(1 - u_{i-1}) + U] \exp\left(-\frac{t_s^{(i)} - t_s^{(i-1)}}{\tau_f}\right)$$



248 where  $\tau_d$  and  $\tau_f$  are the depression and facilitation time-constants.  $U$  is the release probability, and  
249  $f$  is the magnitude of facilitation. To make the estimation more tractable, we approximate the full  
250 optimization problem and estimate synaptic delay,  $t_d$ , and time-constant,  $\tau_\alpha$ , by fitting  $\alpha(t)$  using  
251 the full cross-correlogram, as above. We fix these parameters for the rest of the optimization  
252 process. We then maximize a penalized, Bernoulli log-likelihood  $\log(l(\boldsymbol{\theta})) = \sum \sum [y_{ij}\lambda_i(t_j) -$   
253  $(1 - y_{ij})(1 - \lambda_i(t_j))]$  +  $\gamma\|\boldsymbol{\theta}'_{stp}\|_2$  where  $\gamma = 1$  is the regularization hyperparameter to estimate  
254 the parameters:  $\boldsymbol{\theta} = \{\beta_0, \boldsymbol{\beta}_{c=1:C}, \boldsymbol{\beta}_{h=1:H}, A_s, \boldsymbol{\theta}_{stp}\}$ ,  $\boldsymbol{\theta}_{stp} = \{\tau_d, \tau_f, U, f, \tau_s\}$ .

255 As with previous applications of GLMs, we assume that bins are conditionally independent given  
256 the covariates, but unlike many other GLMs, here we only calculate the log-likelihood during short  
257 intervals (5ms) after presynaptic spikes. With  $y_{ij}$  being a binary value representing the presence of  
258 a postsynaptic spike in the  $j$ -th time bin after the  $i$ -th presynaptic spike. We again used a  
259 logarithmic transformation for the time-constants to avoid negative values and logit transformation  
260 for  $U$  and  $f$  to bound their values in the interval  $[0, 1]$ ;  $\boldsymbol{\theta}'_{stp} =$   
261  $\{\log(\tau_d), \log(\tau_f), \text{logit}(U), \text{logit}(f), \log(\tau_s)\}$ . By modeling STP this model is no longer a strict  
262 GLM, and the log-likelihood may have local maxima. Here we use random restarts to avoid local  
263 maxima in our optimization process. The parameters of each restart  $\{\beta_0, \boldsymbol{\beta}_{c=1:C}, \boldsymbol{\beta}_{h=1:H}, A_s\}$  are  
264 initialized by adding noise ( $\sim N(0,1)$ ) to the corresponding parameters in a standard GLM. We  
265 initialize the log-transformed plasticity parameters with  $\tau_d^{(0)} \sim N(-1,5)$ ,  $\tau_f^{(0)} \sim N(-1,5)$ ,  
266  $U^{(0)} \sim N(0,5)$ ,  $f^{(0)} \sim N(0,5)$ ,  $\tau_s^{(0)} \sim N(-3,5)$ . We then use an LBFGS algorithm to optimize the  
267 log-likelihood where we calculate all derivatives analytically except for derivatives of  $\boldsymbol{\theta}_{stp}$  which  
268 we calculate numerically. To estimate the uncertainty of the parameters, we bootstrap the data  
269 from each of the strong synapses by chunking the whole recording time into samples of 50 seconds  
270 then resampling the chunks to generate a new spike train with the same original length.

## 271 **Calculating spike transmission probability**

272 To demonstrate how the probability of postsynaptic spiking changes according to the  
273 corresponding presynaptic inter-spike intervals, we estimated spike transmission probabilities  
274 from the cross-correlograms directly instead of using a model. To calculate this probability, we  
275 focused on a transmission interval after the presynaptic spike where the conditional intensity (when  
276 corrected for the baseline rate) goes above 10% of the maximum of  $\alpha(t)$  (horizontal bars in Fig  
277 2A). We split the presynaptic inter-spike interval distribution into log-spaced intervals, and, for  
278 each interval, we calculate the ratio between numbers of postsynaptic spikes in the transmission  
279 interval to the number of presynaptic spikes. Unlike previous studies (Swadlow and Gusev, 2001,  
280 2002) we do not correct this probability for the baseline postsynaptic rate. The uncorrected  
281 probability allows us to more directly compare the model predictions to the empirical spike  
282 transmission probabilities. Since our model gives an estimate of the postsynaptic probability after

283 each individual presynaptic spike, we can average over the same transmission interval. However,  
284 we know if there is a postsynaptic spike in the transmission interval, probability of a postsynaptic  
285 spike goes to  $\sim 0$  for all consecutive bins due to the post-spike dynamics (e.g. refractory period).  
286 Therefore, we measure the predicted probability of a postsynaptic spike in a 5ms window after  $i$ -  
287 th presynaptic spike from binned  $\lambda_i(t_j)$  as follows:  $z_i = \sum_{j=1}^L \lambda_i(t_j) \prod_{m=1}^{j-1} (1 - \lambda_i(t_m))$ . Here we  
288 assume conditional independence of the  $j$ -th bin after a presynaptic spike, but we enforce a  
289 refractory period for all bins after a postsynaptic spike in our generative model. Here  $L$  is the first  
290 bin that  $y_{ij}$  is nonzero.  $z_i$  represents the probability of postsynaptic spiking after each presynaptic  
291 spike and we fit a smooth curve over the distribution of  $z_i$ 's and their corresponding inter-spike  
292 intervals to compare with the empirical spike probability patterns.

### 293 **Modeling the effect of local patterns of pre- and postsynaptic spiking**

294 The observed and modeled spike transmission patterns, as calculated above, reflect the expected  
295 postsynaptic spike probability given a specific presynaptic ISI. However, since the presynaptic  
296 ISIs are not independent and there are serial correlations in ISIs, the detailed sequence of the pre-  
297 and postsynaptic spiking likely affects the shapes of these curves. To quantify the effects of serial  
298 ISI correlations on the model of spike transmission probability we demonstrate how local patterns  
299 of presynaptic spiking modifies spike transmission patterns in the data and the model. For each of  
300 the three strong identified synapses we measure postsynaptic spiking probability in response to  
301 presynaptic spike triplets. Due to the limited number of spikes in our data, we divide the  
302 presynaptic ISI distribution into few log-spaced intervals and measure the postsynaptic spiking  
303 probability for triplets with the two ISIs that fall in those intervals. Similarly, we measure the  
304 predicted postsynaptic probability in response to the presynaptic triplets. After measuring  
305 postsynaptic responses to presynaptic spike triplets in the data and the model, we simulate the  
306 contribution of STP in shaping the transmission pattern in response to these triplets. To factor out  
307 contributions of the postsynaptic history and slow changes in presynaptic firing rate, we fix the  
308 corresponding values in the model to their average values within the model. In these simulations,  
309 we also fix the initial values of the STP dynamics in the TM model for the first spike of the triplets  
310 to the average  $R$  and  $u$  within the model. This approach enables us to illustrate how short-term  
311 synaptic plasticity in triplets of presynaptic spikes changes spike transmission probability and how  
312 serial correlations in presynaptic spiking affect spike transmission probability.

313 The postsynaptic spike history and the serial correlations between the pre- and postsynaptic spiking  
314 also modify spike transmission probability patterns. To investigate history effects in the local  
315 pattern of pre- and postsynaptic spikes, we measured the postsynaptic spiking probability in  
316 response to two presynaptic spikes and a postsynaptic spike preceding the most recent presynaptic  
317 spike. Due to the limited number of spikes and sparseness of the split cross-correlograms, we again  
318 divided the presynaptic and postsynaptic ISI distributions into a few log-spaced intervals. We then  
319 measure the spike transmission probability for a group of presynaptic spikes that their preceding

320 presynaptic ISIs and postsynaptic spike ISIs fall into different combinations of pre- and  
321 postsynaptic log-spaced intervals. After measuring postsynaptic responses to any possible  
322 combination of the two most recent presynaptic spikes and their postsynaptic spikes in the data  
323 and the model, we simulate the contribution of the history and STP together in shaping the  
324 transmission. In our simulation the excitability was set to the model estimates. To measure the  
325 effects of postsynaptic spiking history, for each postsynaptic ISI, we fix the history contribution  
326 to estimated post-spike history filter value at that postsynaptic ISI. We then use the predicted STP  
327 parameters from the data to simulate the STP contribution in response to paired pulses of  
328 presynaptic ISIs where we again fix the initial values of the TM model for the first presynaptic  
329 spike to the average  $R$  and  $u$  within the model. This approach enables us to illustrate how short-  
330 term synaptic plasticity in local patterns of two presynaptic spikes and a postsynaptic spike  
331 changes spike transmission probability and quantifies how serial correlations between pre- and  
332 postsynaptic spiking affect spike transmission probability.

### 333 **Evaluating prediction accuracy**

334 In addition to evaluating the estimated parameters and comparing the model to empirical spike  
335 transmission probabilities, we also assess how accurately the model can predict postsynaptic  
336 spiking. Not only can we predict the probability of a spike given specific presynaptic ISIs, but we  
337 can also predict whether there will be a postsynaptic spike following each individual presynaptic  
338 spike. To quantify how well the predicted postsynaptic spike probability,  $z_i$ , predicts the  
339 postsynaptic spiking activity, we use Receiver Operating Characteristic (ROC) curves. To compute  
340 the ROC curve, we first create a threshold version of  $z_i$  which operates as our prediction:  $\{\hat{r}_i =$   
341  $1\}$  if  $(z_i > \text{thr})$ ; 0 otherwise. Changing the threshold from 0 to 1 traces out a relationship between  
342 the true positive rate (TPR) and false positive rate (FPR). The area under the ROC curve (AUC)  
343 reflects the performance of each model, where a perfect classifier has  $\text{AUC}=1$  and a random  
344 classifier has  $\text{AUC}=0.5$ . Effectively, the AUC is the probability of a randomly chosen spike having  
345 a higher model probability than a randomly chosen non-spike (Hatsopoulos et al., 2007). Here we  
346 calculate the AUC for short intervals ( $\sim 5\text{ms}$ ) after presynaptic spikes and check whether we detect  
347 a postsynaptic spike in the transmission interval where  $\alpha(t)$  is above 10% of its maximum. Here  
348 we compare the AUC for the static model of connectivity without short-term synaptic plasticity  
349 with our dynamical model.

### 350 **A simplified rate model to simulate effects of synaptic summation and post-spike history**

351 Our TM-GLM's prediction of the spike transmission pattern is data-driven and depends on the full  
352 history of pre- and postsynaptic spiking. To better understand and illustrate how STP, synaptic  
353 summation, and post-spike history interact to create the observed patterns of spike transmission,  
354 we simulated postsynaptic responses in a simplified voltage model. Namely, we consider PSP  
355 summation in response to a pattern of two presynaptic spikes. We assume that the synapse is  
356 initially fully recovered, and the PSC amplitudes are determined by the 4-parameter TM model with

357  $U = 0.7$ ,  $\tau_d = 1.7$ ,  $\tau_f = 0.02$ ,  $f = 0.05$  for the depressing synapse and  $U = 0.1$ ,  $\tau_d = 0.02$ ,  $\tau_f =$   
358  $1$ ,  $f = 0.11$  for the facilitating synapse (Ghanbari et al., 2017). We then convolve the PSCs (delta  
359 function kernel) with a PSP kernel,  $\exp(-t/\tau_v) - \exp(-t/\tau_r)$ , with  $\tau_v = .01$  and  $\tau_r = .001$  ms to  
360 describe synaptic summation. We assume that the instantaneous postsynaptic spike probability is  
361 simply a nonlinear function of the distance to a threshold voltage  $\sigma(5(V(t) - V_{th}))$  where  $\sigma(x) =$   
362  $1/(1 + e^{-x})$  and  $V_{th} = .5$ ,  $.75$ , and  $1$  correspond to strong, moderate, and weak inputs  
363 respectively. The spike transmission probability sums this instantaneous probability over a  
364 window of 20ms after each presynaptic spike. Finally, we adjust the spike transmission probability  
365 for the second PSP to account for potential post-spike history effects. Namely, we assume that the  
366 adjusted spike transmission probability for the second spike is  $p_2^* = (1 - p_1)p_2 + p_1p_2f_{ahp}$  where  
367  $p_1$  is the transmission probability for the first spike,  $p_2$  is the unadjusted probability for the second  
368 spike, and  $f_{ahp}$  is the effect of the after-hyperpolarization. Here we use  $f_{ahp}(\Delta t) = (\sigma(150(\Delta t -$   
369  $0.02)) - c)/d$  where  $\Delta t$  is the presynaptic ISI, and  $c$  and  $d$  are constants ensuring that  $f_{ahp}(0) =$   
370  $0$  and  $f_{ahp}(\infty) = 1$ . Although this simulation is highly simplified, it demonstrates how the  
371 observed spike transmission pattern depends, not just on the type and timescale of STP, but on the  
372 interaction between STP, synaptic summation, after-hyperpolarization effects, and the spike  
373 nonlinearity.

#### 374 **Simulation of non-connections**

375 The TM-GLM relies on correctly identifying monosynaptic connections. To investigate how our  
376 model performs when there is no actual synapse, we simulated a microcircuit with three neurons  
377 where a presynaptic neuron provides excitatory input to two postsynaptic neurons with different  
378 delays (1 and 3 ms). Here we test how different combinations of STP (depression and facilitation)  
379 in connections between pre- and postsynaptic neurons would impact the overall estimation of spike  
380 “transmission” probability in the spurious connection between the two postsynaptic neurons. Here  
381 the spikes of the presynaptic neuron were simulated from an inhomogeneous Poisson process with  
382 random, smooth rate fluctuations (5Hz average, 4.6Hz sd). The postsynaptic neurons were then  
383 simulated using a leaky integrate-and-fire neuron with spike frequency adaptation (parameters are  
384 from (Ghanbari et al., 2017)) that received a white noise current as input as well as a current-based  
385 synapse from the presynaptic neuron (double exponential with rise time 1ms, decay time 10ms).  
386 The PSCs of the input then vary according to the Tsodyks-Markram model (parameters for  
387 depression/facilitation are as in (Ghanbari et al., 2017)).

#### 388 **Results**

389 Short-term synaptic plasticity directly affects synaptic information processing by altering the  
390 amplitude of presynaptic currents (Abbott and Regehr, 2004). However, in most neural systems it  
391 remains unclear how these presynaptic effects translate to modified postsynaptic spike probability.

392 Postsynaptic spiking is affected by many factors including short-term plasticity, postsynaptic spike  
393 history, summation of PSPs, and slow fluctuations in excitability. Here we develop a statistical  
394 model that includes each of these factors and allows their effects to be estimated solely using pre-  
395 and postsynaptic spiking activity. We examined the model's ability to capture the observed  
396 patterns of spike transmission probability for three strong putative or identified synapses. We then  
397 use one of these systems (the endbulb of Held synapse in the auditory brainstem), to explore how  
398 the short-term dynamics of spike transmission depend on an external stimulus and compare the  
399 results with a model without short-term synaptic plasticity. Finally, we apply our model to spiking  
400 data from a large-scale, multi-electrode array recorded from multiple areas in an awake mouse.  
401 Here we investigate the STP dynamics in putative synapses from excitatory neurons onto two  
402 putative inhibitory neuron subtypes. We find that these two types of connections have distinct  
403 patterns of spike transmission, consistent with previous experimental observations.

#### 404 **Spike transmission probability varies strongly as a function of presynaptic ISIs**

405 Cross-correlograms of excitatory monosynaptic connections show a rapid, transient increase in the  
406 postsynaptic spiking probability shortly after the presynaptic spike, with a latency of  $\sim 2$ -4ms  
407 (Perkel et al., 1967; Fetz and Gustafsson, 1983; Fetz et al., 1991; Poliakov et al., 1996). The timing  
408 and shape of the cross-correlogram depends on the presynaptic axonal conduction delay, the  
409 synaptic delay, and the strength of the connection. However, in the overall cross-correlogram the  
410 effects of all presynaptic spikes are averaged and any variations in spike transmission, such as  
411 dependence on the history of presynaptic spiking, are hidden (Fig. 2A). To quantify how the history  
412 of presynaptic spiking influences spike transmission probability, the probability of observing a  
413 postsynaptic spike shortly after a presynaptic spike, previous studies have compared the cross-  
414 correlograms for specific subsets of presynaptic spikes. For instance, comparing the cross-  
415 correlograms calculated for presynaptic spikes within defined inter-spike intervals (ISI)  
416 demonstrates how spike transmission probability varies depending on recent presynaptic spiking  
417 (Swadlow and Gusev, 2001; English et al., 2017). Here, to illustrate the diversity of short-term  
418 dynamics in spike transmission, we examine three strong synapses from three distinct neural  
419 systems: (i) a pair of neurons in thalamus in a male mouse, (ii) a projection from ventrobasal  
420 thalamus to somatosensory barrel cortex (VB-Barrel) in a female rabbit, and (iii) the auditory nerve  
421 fiber to spherical bushy cell projection in a female gerbil (ANF-SBC), the endbulb of Held. The  
422 short-term synaptic dynamics of thalamocortical projections, have been extensively characterized  
423 *in vivo* (Swadlow and Gusev, 2001; Stoelzel et al., 2008, 2009). Similarly, ANF-SBC synapses  
424 have been extensively studied in previous experiments and are well-characterized *in vitro*  
425 (Thomson et al., 2002; Yang and Xu-Friedman, 2008, 2009). The presynaptic neurons in each of  
426 these pairs have distinct ISI distributions (Fig. 2B), and, after splitting the spikes into ISI quantiles  
427 and calculating the correlogram for each quantile, we find that postsynaptic responses differ  
428 following short and long presynaptic ISIs (Fig. 2C). For the pair of thalamic neurons, spike  
429 transmission probability is increased at short and long intervals and reduced for mid-range ISIs



430 (based on  $n=62661$  presynaptic spikes). For the VB-Barrel connection, transmission probability is  
431 higher for longer ISIs (based on  $n=68345$  presynaptic spikes), while for ANF-SBC the highest  
432 transmission probability occurs at intermediate intervals (based on  $n=20547$  presynaptic spikes).  
433 These three cases illustrate that the short-term dynamics of spike transmission can be highly  
434 diverse between neurons and brain regions.

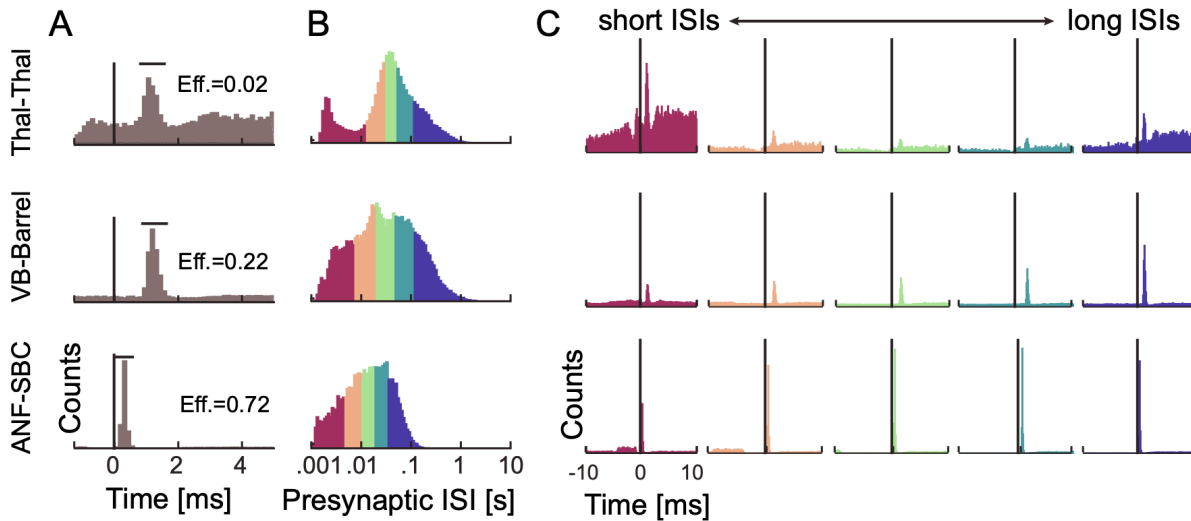

435

436 **Fig. 2: Spike transmission probability depends on the presynaptic ISI and differs between synapses.**

437 **A)** Cross-correlograms between pre- and postsynaptic spiking at three different synapses show an increase  
438 in the postsynaptic spike count (or probability) after a short latency, indicative of a monosynaptic  
439 connection. The efficacy (Eff.) for each synapse is calculated as the ratio between the number postsynaptic  
440 spikes that are above baseline in the transmission interval (denoted by the horizontal bar) and the number  
441 of presynaptic spikes. **B)** Inter-spike interval distributions (log-scale) for the presynaptic neurons. The  
442 distributions are color-coded into 5 quantiles with equal numbers of presynaptic spikes. **C)** We calculate a  
443 separate cross-correlogram using the subset of presynaptic spikes where the preceding spike fell within  
444 each ISI range. Colors correspond to (B) going from shorter presynaptic ISIs (left) to longer ISIs (right).  
445 Note that both the baseline firing rate and the synaptic peak for each connection change as a function of  
446 presynaptic ISI.

447 **The shape of spike transmission patterns depends on multiple factors**

448 One potential explanation for the diverse dynamics of short-term spike transmission (Fig. 2) may  
449 be that some synapses are depressing while others are facilitating. Short-term synaptic plasticity  
450 directly alters postsynaptic currents such that the response after each presynaptic spike depends on  
451 the recent history of presynaptic spiking (Markram et al., 1998; Ghanbari et al., 2017). However,  
452 many factors can influence spike timing in addition to the dynamics of a single synapse. At short  
453 presynaptic ISIs, membrane potential summation can lead to larger PSPs and increased spike  
454 probability, even in absence of short-term synaptic plasticity (Carandini et al., 2007). Additionally,



455 the spiking nonlinearity and the history of postsynaptic spiking can alter how a given pattern of  
456 presynaptic input is transformed into postsynaptic spiking (Pillow et al., 2008; Huang et al., 2016).  
457 To illustrate how STP, synaptic summation, and postsynaptic history interact to create a particular  
458 spike transmission pattern we performed simulations using a simplified spiking model with linear  
459 voltage summation, short-term plasticity, a soft spiking nonlinearity, and an after-  
460 hyperpolarization (Fig. 3).

461 Similar to experimental data (Markram et al., 1998; Ghanbari et al., 2017), the spike transmission  
462 probability in this simplified model depends on the presynaptic ISI as well as the type of STP. For  
463 depressing synapses, the spike transmission probability increases for longer presynaptic ISIs while  
464 for facilitating synapses it increases for mid-range ISIs. Independent of STP type, PSPs sum at  
465 short ISIs (Fig. 3A). However, in this model, the exact shape of transmission probabilities also  
466 depends on the strength of the synapse and the history of postsynaptic spiking. An after-  
467 hyperpolarization current following each postsynaptic spike, for instance, can briefly decrease the  
468 probability of subsequent spikes. In our simulation, we find that “spike interference” from previous  
469 postsynaptic activity can counteract membrane potential summation (Fig. 3B). This type of  
470 postsynaptic spike interference generally decreases the spike probability for shorter presynaptic  
471 ISIs, but the magnitude of this decrease depends on the synaptic strength and type of STP (Fig.  
472 3C). Together, these simulations illustrate how patterns of spike transmission probability are the  
473 result of, not just STP, but of the complex interaction between the membrane potential, the spike  
474 nonlinearity, the post-spike history, and short-term synaptic plasticity.

475

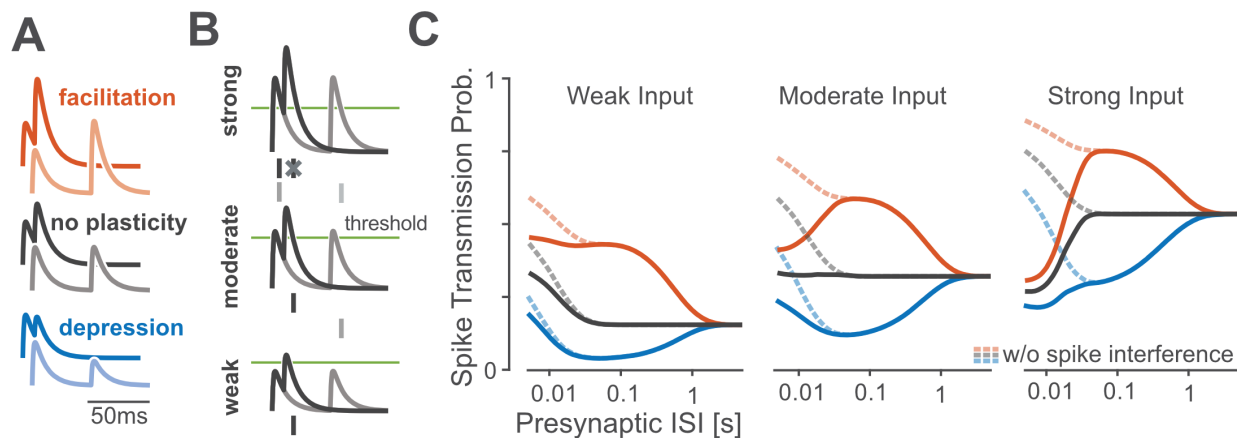

476

477 **Fig. 3: A simulation of a simplified spiking model shows how spike transmission probability depends**  
478 **on multiple factors.** **A:** For different types of short-term synaptic plasticity, postsynaptic summation  
479 increases the amplitudes of the postsynaptic potentials (PSP) at shorter ISIs. Lines denote the membrane  
480 potential of a postsynaptic neuron in a simplified model as it responds to short (dark traces) and long (light)  
481 paired presynaptic pulses. Relative amplitudes of excitatory PSPs increase or decrease under the simplified  
482 model depending on the type of STP. **B:** Spike generation changes with synaptic strength. In this paired-

483 pulse stimulation paradigm, stronger synapses are more likely to generate a spike following the first  
484 presynaptic impulse which can then decrease the spiking probability following the second impulse if there  
485 are post-spike history effects. As in (A) traces denote postsynaptic membrane potential responses to short  
486 (dark) and long (light) presynaptic ISIs. Dashes denote example postsynaptic spiking, with “spike  
487 interference” occurring for strong synapses and short ISIs. C: The pattern of spike transmission probability  
488 under the simplified model changes depending on the type of STP, the coupling strength, and presence of  
489 post-spike interference. Dashed lines show transmission probability without interference from previous  
490 postsynaptic spikes, while solid lines show how post-spike history effects can decrease the spike  
491 transmission probability.

## 492 **Spike transmission patterns are diverse across regions and species**

493 The combination of synaptic and non-synaptic factors could be one explanation for the diversity  
494 of spike transmission patterns in experimental data. Here we aim to model these contributions and  
495 extend a previously developed generalized linear model (GLM) framework for static functional  
496 connections (Harris et al., 2003; Truccolo et al., 2005; Pillow et al., 2008). In the previous, static  
497 GLM the probability of postsynaptic spiking is modeled as a linear combination of a baseline firing  
498 rate parameter, a post-spike history filter to capture the postsynaptic spike dynamics, such as  
499 refractoriness and burstiness, and a coupling filter describing the fixed influence of presynaptic  
500 spikes. The sum of these effects is then passed through a spiking non-linearity. In our extended  
501 model we added a linear term that allows changes in the excitability of the postsynaptic neuron as  
502 a function of time (timescale  $>1$  min) and allow the coupling term to change for each presynaptic  
503 spike according to the Tsodyks and Markram (TM) model of STP (Markram et al., 1998). We fit  
504 the parameters of this TM-GLM using only the pre- and postsynaptic spike observations and obtain  
505 parameters for each effect using approximate maximum likelihood estimation (see Methods). This  
506 provides estimates of the history and coupling filters, as in a static GLM, as well as additional  
507 parameters for the dynamical synapse (TM model), including facilitation, depression, membrane  
508 time-constants, and release probability. Given these parameters, this TM-GLM model provides  
509 estimates of the postsynaptic spiking probability following each observed presynaptic spike and  
510 can also predict spike transmission probabilities in response to arbitrary patterns of presynaptic  
511 inputs.

512 After fitting the model to pre- and postsynaptic spike-trains, we compared its behavior to  
513 experimentally observed patterns of spike transmission probability. In particular, we compare  
514 peaks in the split cross-correlograms to the average model prediction for the same sets of  
515 presynaptic spikes (see Methods). We find that our model is flexible enough to explain the changes  
516 in spiking transmission probability observed in spiking statistics for all three synapses above  
517 (Fig. 4A). Moreover, using the model-based approach, the contributions of the synaptic and non-  
518 synaptic component can be disentangled. Our results suggest that the pattern of spike transmission  
519 probability for the thalamus connection is dominated by a combination of membrane potential  
520 summation and short-term depression. Although depression decreases spike transmission

521 probability at shorter ISIs, membrane summation acts to increase postsynaptic spiking. The ANF-  
522 SBC synapse, in contrast, shows an increase in spike transmission probability for a medium range  
523 of ISIs that is explained by a model dominated by short-term facilitation. Lastly, the VB-Barrel  
524 connection shows a higher postsynaptic response for spikes following longer ISIs (isolated) that is  
525 explained by the model as an effect of short-term synaptic depression.

526 In addition to estimating the contributions of synaptic and non-synaptic factors that affect spike  
527 transmission, the model also improves the prediction of postsynaptic spiking. Although the cross-  
528 correlogram provides an average efficacy for spike transmission, our models provide detailed  
529 predictions of the postsynaptic spike probability following each presynaptic spike. Here we  
530 measure the Receiver Operating Characteristics (ROC curves) of our models during this short  
531 window of time following a presynaptic spike (see Methods). We compare the prediction of  
532 postsynaptic spiking activity in the full, dynamic synapse model and a static synapse model  
533 containing all components except STP. In all three datasets, a model with short-term synaptic  
534 plasticity provides substantially better predictions of the postsynaptic spiking activity. For the  
535 model with short-term synaptic plasticity accuracies were  $AUC=0.75\pm 0.005$ ,  $0.69\pm 0.002$ , and  
536  $0.79\pm 0.011$  (mean  $\pm$  SE) for the Thalamus pair, VB-Barrel, and ANF-SBC connections,  
537 respectively; compared to a model without STP where the model accuracies were  
538  $AUC=0.54\pm 0.003$ ,  $0.48\pm 0.002$ , and  $0.56\pm 0.003$  (mean  $\pm$  SE, bootstrapping over presynaptic  
539 spikes). Note that, although static synapse models do account for the average increased probability  
540 of spiking following a presynaptic spike, the fact that the AUC values are near chance (0.5)  
541 indicates that they do not accurately predict which presynaptic spikes will lead to a postsynaptic  
542 response and which will not.

543 In our model, the short-term dynamics of spike transmission are described by two coupled  
544 differential equations with five parameters:  $\theta_{stp} = \{\tau_d, \tau_f, U, f, \tau_s\}$  (see Methods). Here we  
545 estimate values for depression, facilitation, and membrane time-constants along with release  
546 probability,  $U$ , and magnitude of facilitation,  $f$ , (Fig. 4B). Since these values are estimated from  
547 spikes and in observational settings rather than controlled experiments, the parameter estimates  
548 are likely to be biased by omitted variables (Stevenson, 2018). However, the parameter estimates  
549 do provide accurate predictions of postsynaptic spiking during natural, ongoing pre- and post-  
550 synaptic spiking, and may provide an initial, approximate description of synaptic dynamics.  
551 Comparing the estimates for the three model synapses – the thalamus pair has the highest release  
552 probability ( $0.29\pm 0.04$  SE) and the largest membrane ( $14\pm 2$  ms) and depression time-constants  
553 ( $410\pm 107$  ms). The VB-Barrel connection has a small membrane time-constant ( $0.3\pm 0.003$  ms)  
554 and a larger depression ( $182\pm 8$  ms) time-constant than facilitation time-constant ( $105\pm 9$  ms). The  
555 ANF-SBC synapse has the lowest release probability of the three connections ( $0.068\pm 0.006$ ) and  
556 small depression ( $67\pm 6$  ms) and membrane time-constant ( $0.25\pm 0.02$  ms). Due to the potential  
557 for omitted variable bias and differences in experimental preparations comparing these values

558 directly to measurements from intracellular recordings is difficult. However, the values estimated  
559 from ongoing spiking and the results from intracellular recordings are generally in agreement. For  
560 instance, previous *in vitro* studies of thalamocortical projections found that paired-pulse ratios  
561 ranged from 0.3-0.9 consistent with depressing VB-Barrel synapses (Gil et al., 1997).  
562 Additionally, *in vitro* observations of ANF-SBC connections report depression time-constants on  
563 the order of 2-25 ms in response to a 100 Hz stimulus train (Wang and Manis, 2005, 2008). These  
564 previous estimates are substantially faster than the time-constants estimated by the TM-GLM for  
565 the ANF-SBC connection here. However, different patterns of presynaptic input (e.g. regular,  
566 Poisson, natural) or differences in calcium concentration and temperature may make it difficult to  
567 compare *in vitro* and *in vivo* STP parameters directly. One parameter that may be more readily  
568 comparable across preparations is the membrane time-constant. We find that the estimated  
569 membrane time-constant from the TM-GLM for the thalamus pair is consistent with thalamus relay  
570 cells observed intracellularly ( $12.2 \pm 1.1$  ms,  $n=8$ ) (Paz et al., 2007), and the estimated membrane  
571 time-constant for ANF-SBC is close to *in vitro* measurements ( $1.05 \pm 0.09$  ms) as well (Wang and  
572 Manis, 2005).

573 The TM-model used here is one of many possible parametric descriptions of short-term plasticity  
574 (Hennig, 2013). Previous work modeling intracellular recordings suggests that the full TM model  
575 may not be necessary to explain STP at some, purely depressing synapses (Costa et al., 2013).  
576 Therefore, we explored how simplified TM models of STP, with fewer parameters, compare with  
577 the full model using the Akaike information criterion (AIC; see Methods and Fig 4C). AIC  
578 evaluates model accuracy (log-likelihood) penalized by the number of parameters, and lower AIC  
579 may indicate that a simplified model with fewer parameters is preferred over a more complex  
580 model. Generally, the synaptic dynamics in this class of models can be described by four  
581 parameters: a time-constant for depression  $\tau_d$ , a time-constant for facilitation  $\tau_f$ , a baseline release  
582 probability  $U$ , and facilitation parameter  $f$ . When modeling spike transmission we additionally  
583 include a parameter for the membrane time-constant  $\tau_s$  and consider the possibility that the  
584 membrane potential “resets” following a post-synaptic spike (see Methods). For each of these  
585 models, it is important to note there may be many possible parameter settings that are consistent  
586 with the data, particularly when the recording time is limited (Costa et al., 2013). These  
587 redundancies are present even in simple quantal analysis methods (Bykowska et al., 2019). Here,  
588 altogether, we compare our full model to five reduced models: 1) a model with only membrane  
589 integration, without dynamic release probability and resources, 2) a facilitation only model, 3) a  
590 depression only model, 4) a 3-parameter TM model where the magnitude of facilitation is fixed,  
591 and 5) the full TM model, but without post-spike reset of integration (Table 1). The full TM model  
592 performs competitively in all cases, but, for some synapses, just as with previous results modeling  
593 PSPs (Costa et al., 2013), the full model may be overly flexible and simpler models, with fewer  
594 parameters, may be preferred. For the thalamus pair and VB-Barrel projection, the 3-parameter  
595 TM-model with fixed magnitude of facilitation has the lowest AIC ( $p < 10^{-9}$  and  $p = 0.07$  compared

596 to model 6 with a paired t-test). For the ANF-SBC connection the full model gives the lowest AIC  
 597 ( $p < 10^{-6}$  compared to model 4). For all three connections, models 4-6 perform statistically  
 598 significantly better than both the model without STP (e.g.  $\Delta AIC < 0$ , Bonferroni-corrected paired t-  
 599 test  $p < 0.001$ ) and model 1 (Bonferroni-corrected paired t-test,  $p < 0.001$ ). These results provide  
 600 further evidence for STP-like changes in spike transmission at these connections.

601

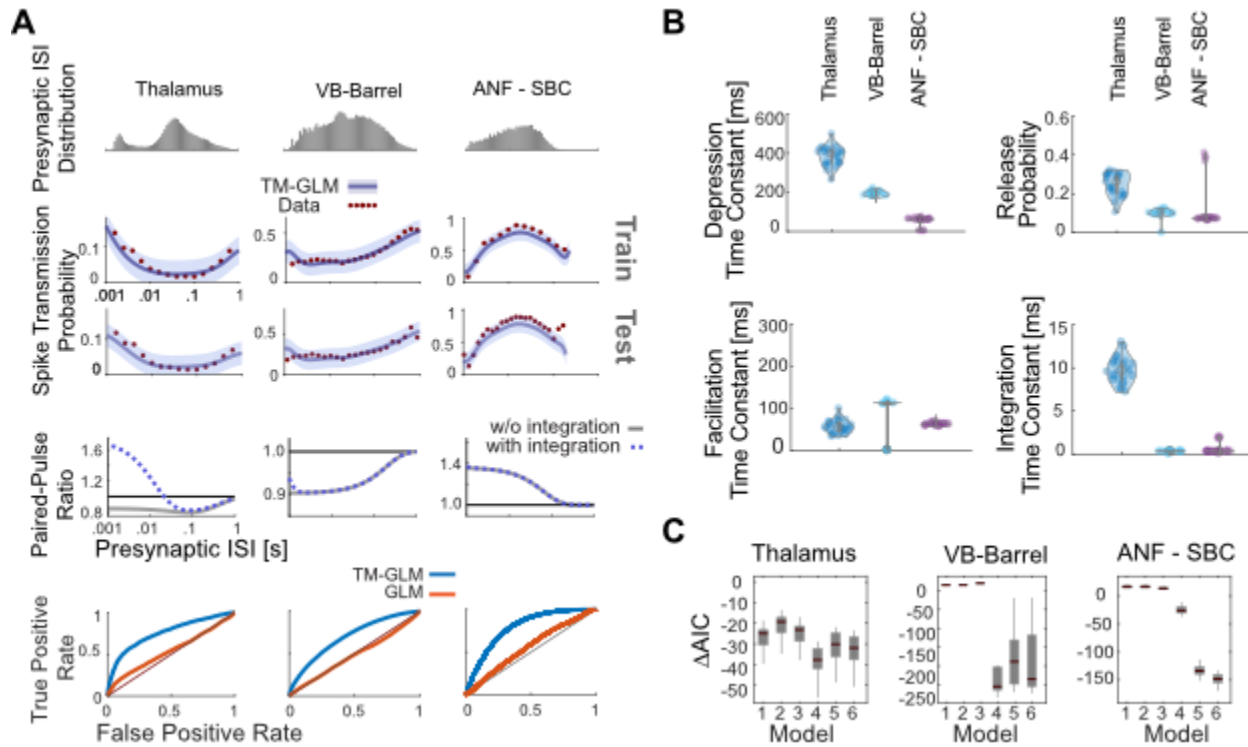

602

603 **Fig. 4 Including short-term dynamics substantially improves the model of spike transmission. A:**  
 604 Spike transmission patterns are diverse across different connections. For three different connections  
 605 (between a pair of neurons in thalamus, a projection from ventrobasal thalamus to somatosensory cortex,  
 606 and an auditory nerve fiber projection onto a spherical bushy cell) transmission patterns are modeled by a  
 607 combination of different factors. For each synapse, top panels show the presynaptic ISI distributions (log-  
 608 spaced). In the second/third row, the observed spike transmission probability (red data points) and model  
 609 predictions (blue with 95% confidence bands) for training and test set (2-fold cross-validation). We then  
 610 used the estimated TM parameters for each synapse and simulated responses to paired presynaptic pulses.  
 611 Blue curves denote the PPRs of the full model, and gray lines denote PPRs by taking synaptic summation  
 612 out. (bottom row) TM-GLM (blue) are superior in predicting individual postsynaptic transmission events  
 613 compared to GLM (orange, without STP) for each synapse type. For each individual presynaptic spike, we  
 614 compare the model transmission probability with the observed binary outcome. ROC curves show the  
 615 prediction accuracy with positive deviations from the diagonal indicating better performance. **B:** Estimates  
 616 for the four STP parameters of the model for each synapse. Dots represent estimates from bootstrap sampled  
 617 data. **C:** Model comparison for 6 different models (Akaike information criteria, AIC, relative to a model



618 without plasticity). Models: 1) Integration only, 2) Facilitation only, 3) Depression only, 4) 3-parameter  
 619 TM, 5) 4-parameter TM without resetting integration, and 6) Full model. Boxplots denote the difference in  
 620 AIC values for bootstrap samples in (B).

621

622

| Model | Description       | $\tau_d$       | $\tau_f$       | $f$     | $U$            | Reset |
|-------|-------------------|----------------|----------------|---------|----------------|-------|
| 1     | Integration only  | 0              | 0              | 1       | 1              | Yes   |
| 2     | Facilitation only | 0              | No constraints |         |                | Yes   |
| 3     | Depression only   | No constraints |                | 0       | No constraints |       |
| 4     | 3-parameter TM    | No constraints |                | $f = U$ |                | Yes   |
| 5     | TM without reset  | No constraints |                |         |                | No    |
| 6     | Full model        | No constraints |                |         |                | Yes   |

623

624 **Table 1: Parameters included each model.** Note that  $\tau_s$  is not constrained in any of the 6 models.

625

## 626 Recent patterns of pre- and postsynaptic spiking shape the synaptic transmission probability

627 Although previous studies have focused largely on how spike transmission probability varies as a  
 628 function of the single ISI preceding the most recent presynaptic, synaptic dynamics depend on the  
 629 full sequence of presynaptic spiking. Unlike *in vitro* experiments where the state of the synapse  
 630 can, to some extent, be controlled before studying responses to a specific presynaptic pattern, *in*  
 631 *vivo* measurements of spike transmission can be heavily influenced by higher-order correlations  
 632 between successive ISIs (Stoelzel et al., 2008). Additionally, it is difficult to assess the effects of  
 633 multi-spike patterns empirically by splitting the correlograms, since the number of observations  
 634 for any given presynaptic spike pattern rapidly decreases with the number of spikes in the pattern.  
 635 Here we examine how spike transmission depends, not just on the preceding presynaptic ISI, but  
 636 on triplets of spikes. We compare the empirically observed spike transmission probability  
 637 following triplets to the estimated spike transmission probability from the TM-GLM. Using the  
 638 model fits for TM-GLM, we then simulate postsynaptic responses to isolated patterns of spikes  
 639 and determine to what extent the observed spike transmission patterns are influenced by higher-  
 640 order correlations between successive ISIs.

641 First, in addition to the timing of the two preceding presynaptic spikes (separated by the interval  
 642  $ISI_1$ ), we split correlograms based on the timing of the three preceding presynaptic spikes (Fig.  
 643 5A), separated by the most recent interval and the one before ( $ISI_2$ ). Since the TM-GLM provides  
 644 estimates of the post-synaptic spike probability following every presynaptic spike, we can split



645 both the data and model fits the same way (Fig. 5C). We find that the spike transmission patterns  
646 clearly depend on the triplet patterns of presynaptic spikes in ongoing spiking activity. That is, the  
647 spike transmission probability is influenced by both  $ISI_1$  and  $ISI_2$ , and the interaction between the  
648 two ISIs differs between synapses. However, as with spike transmission as a function of  $ISI_1$  alone,  
649 the TM-GLM accurately captures the patterns of spike transmission for triplets of presynaptic  
650 spikes for the three synapses. In the thalamus pair, spike transmission probability is most  
651 influenced by  $ISI_1$ , and the effect of  $ISI_2$  appears to be weak or, at least, does not appear to be  
652 monotonic. Spike transmission probability at the VB-Barrel connection depends on both  $ISI_1$  and  
653  $ISI_2$ , with higher spike transmission probability for longer  $ISI_2$ , consistent with recovery from  
654 depression. Lastly, for the ANF-SBC connection, transmission probabilities decrease for shorter  
655  $ISI_2$ , but there also appears to be a strong interaction between  $ISI_1$  and  $ISI_2$ , where transmission  
656 probability is high for multiple combinations of these two intervals (e.g. intervals of 10 ms then  
657 100 ms and intervals of 100 ms then 10 ms both result in high probability transmission).

658 Although these empirical results suggest that spike transmission probability is influenced by triplet  
659 patterns of presynaptic spikes, these triplets are not isolated events but are embedded in longer  
660 sequences of spikes with higher-order correlations between successive ISIs. To examine to what  
661 extent the model predictions are affected by higher-order correlations between successive ISIs, we  
662 again use the estimated parameters in the TM-GLM to simulate postsynaptic responses to  
663 hypothetical, isolated triplets of presynaptic spikes (Fig. 5C, bottom). In these simulations we fix  
664 the post-spike history effect and the excitability in the model to their average values from model  
665 fits, and we fix the initial STP state (initial values of  $R$  and  $u$  in TM model) for the first spike in  
666 triplets to the average  $R$  and  $u$  values from the model fits. Although the initial states of the pre-  
667 and postsynaptic neurons in the experimental data are not matched for different values of  $ISI_1$  and  
668  $ISI_2$ , by simulating, we can assess the isolated influence of different triplets ( $ISI_1$  and  $ISI_2$ ) on the  
669 model. Here we find that for the thalamus pair, although the empirical data showed no clear effect  
670 for  $ISI_2$ , the simulated spike transmission probability increases with short  $ISI_2$ , consistent with  
671 strong synaptic summation. One reason that this effect may be masked in the empirical  
672 transmission probabilities is that post-spike history effects could act to decrease the probability of  
673 future postsynaptic spikes. For the VB-Barrel simulations, we find that short  $ISI_2$  decreases  
674 transmission probability, consistent with the empirical transmission patterns, although less  
675 pronounced. Serial correlations in the sequence of presynaptic spikes (such as long bursts) could  
676 act to accentuate the depression in the empirical observations beyond what we see with the  
677 simulated responses to isolated triplets. Finally, for the ANF-SBC, although the empirical  
678 transmission probability showed decreased transmission for short  $ISI_2$ , the simulated responses to  
679 isolated patterns have increasing transmission at short  $ISI_2$  (due to synaptic summation). This  
680 difference is likely due to the post-spike history filter, which has been fixed for the simulations,  
681 but can have a large effect in the experimental data. Since the overall efficacy of this synapse is

682 quite high ( $>0.7$ ), is likely that a postsynaptic spike follows the first or second presynaptic spike  
683 which then influences the response to the third spike.

684 To better understand the effects of post-spike history, we examined how the postsynaptic spiking  
685 history changes the spike transmission patterns with a similar approach. In addition to splitting the  
686 correlograms based on  $ISI_1$ , we also split based on the previous postsynaptic ISI,  $ISI_{post}$  (Fig. 5D).  
687 Here, as with the triplets of presynaptic spikes, we find that the spike transmission patterns depend  
688 on the triplet patterns of 2 pre- and 1 postsynaptic spike in data and that the TM-GLM accurately  
689 captures the patterns of spike transmission at our three synapses (Fig. 5F). Here, for both thalamus  
690 and VB-Barrel pairs, synaptic transmission probability decreases after a long postsynaptic ISI for  
691 all values of  $ISI_1$ . In contrast, the ANF-SBC connection shows decreased transmission probability  
692 at short postsynaptic ISIs.

693 As with the triplets of presynaptic spikes, we then simulate (Fig. 5F, bottom) how patterns of 2  
694 pre- and 1 postsynaptic spike change spike transmission probability when the neurons start from  
695 the same initial conditions (average values of excitability, post-spike history,  $R$  and  $u$ ). For the  
696 thalamus and VB-Barrel pairs, the simulations of isolated patterns match the general trends of  
697 empirical spike transmission. However, for the VB-Barrel synapse, the effect of  $ISI_{post}$  in the  
698 empirical transmission patterns is stronger than in the simulations, suggesting that serial  
699 correlations in ISIs could again play a role and amplify the effects of isolated patterns.

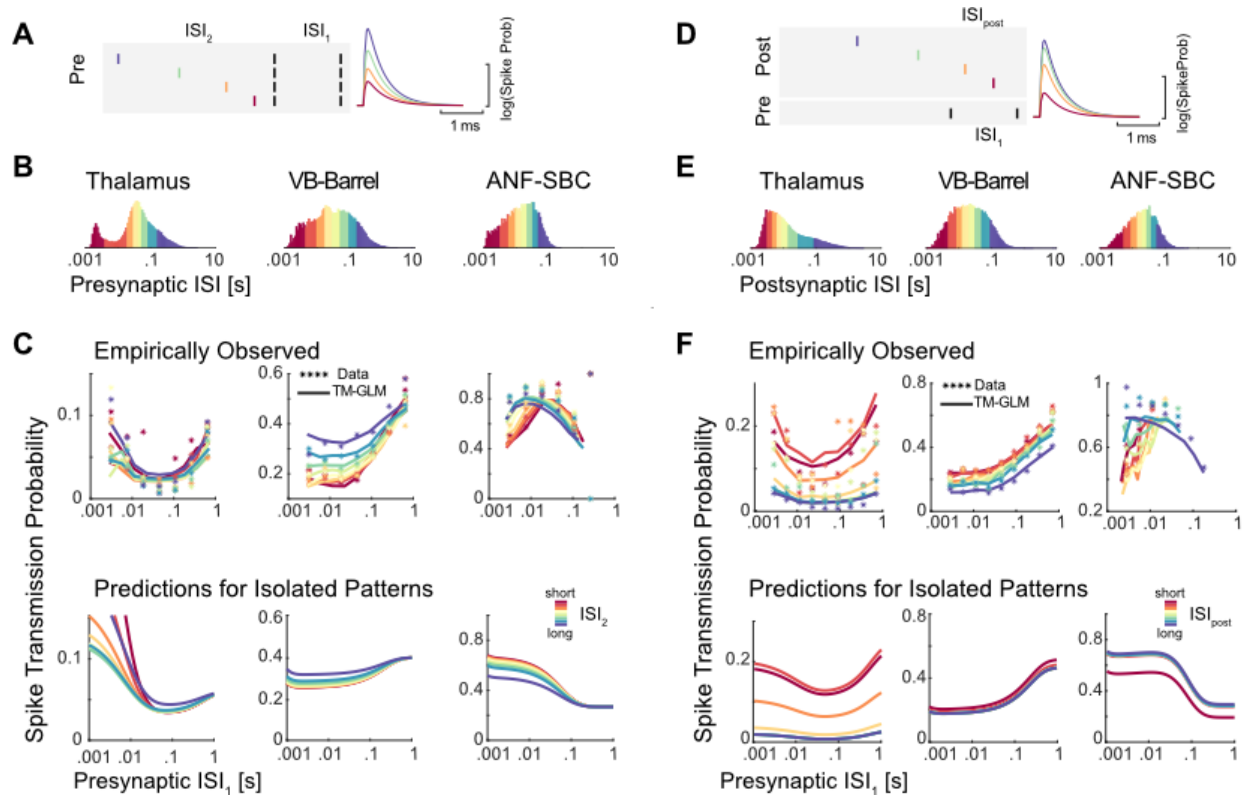

700  
 701 **Fig. 5: Pre- and postsynaptic spiking history determine transmission probability.** A) Schematic  
 702 of 4 different patterns of presynaptic spike triplets with a fixed interval between the two most recent  
 703 presynaptic spikes (spikes denoted by black lines separated by  $ISI_1$ ). B) We then split the presynaptic ISI  
 704 distribution into 8 quantiles, denoted by the different colors. C) We then assess how  $ISI_2$  influences the  
 705 spike transmission previously described for  $ISI_1$ . Using the natural occurrence of different  $ISI_1$  and  $ISI_2$  in  
 706 the data, each data point shows the observed spike transmission probability for each pattern (colors  
 707 correspond to  $ISI_2$  quantiles). Lines denote the average estimated transmission probability for each pattern  
 708 under the model (based on the natural sequence of observed spikes). To examine the influence of serial  
 709 correlations, we then simulate model responses to the isolated triplet pattern, assuming the synapse is  
 710 initially in an average state (bottom panels). D) Synaptic transmission patterns change depending on the  
 711 history of postsynaptic spiking, as well. E) Note that the postsynaptic ISI distributions need not match the  
 712 presynaptic distributions. F) Here each data point in the scatter plots shows the spike transmission  
 713 probability following different combinations of  $ISI_1$  and  $ISI_{post}$ . Here, colors denote quantiles of the  
 714 postsynaptic ISI distribution. Solid lines show the estimated transmission probability for each pattern under  
 715 the model (based on the natural sequence of observed spikes). The bottom panels show model responses to  
 716 isolated patterns using the estimated STP parameters and fixing the excitability from the model fits to their  
 717 average values.

### 718 Spike transmission patterns change depending on stimulus type

719 The results above suggest that the presynaptic spike pattern has a complex effect on spike  
 720 transmission probability. In sensory systems, one factor that affects the presynaptic spike pattern  
 721 is the external stimulus. To examine how differences in stimulus statistics might alter spike

722 transmission, we fitted our model to a dataset recorded juxtacellularly from an ANF-SBC synapse,  
723 presented with *natural sounds*, a range of randomized frequency-level pure-tones (*tuning stimuli*),  
724 and *spontaneous activity* in the absence of acoustic stimulation. Note that this dataset was partially  
725 (*tuning stimuli*) used in the first section of the results. We merged these three datasets and fitted  
726 the model to the merged dataset. As with the previous fits of the ANF-SBC connection (based on  
727 a different set of *tuning stimuli*), the transmission probability under all three conditions exhibits a  
728 bandpass-like pattern in mid-range ISIs suggesting facilitation and little to no synaptic summation.  
729 However, spike transmission during natural stimuli was markedly different from that during pure  
730 tone stimulation. During natural sounds, transmission probability is maximized at 100 ms rather  
731 than 10 ms found in the *tuning stimuli* and during *spontaneous activity*. Further, *natural stimuli*  
732 have much lower transmission probability at short ISIs. Interestingly, the TM-GLM captures the  
733 overall facilitation, but also captures differences due to the different stimuli (Fig 6A). In contrast,  
734 a static GLM captures almost none of the variations in spike transmission probability. Together,  
735 these results suggest that the combination of STP, synaptic summation, history, and excitability is  
736 sufficient to explain the observed differences spike transmission between stimuli, without  
737 requiring any additional adaptation or plasticity.

738 Since these recordings were performed juxtacellularly, we also have access to the slope of  
739 individual (extracellularly observed) PSPs, which are correlated with the intracellular PSP  
740 amplitudes. We compared patterns of individual PSP slopes for each stimulus type and examine  
741 how these slopes correlate with the estimated coupling amplitude following individual presynaptic  
742 spikes in our model (Fig. 6B, 6C). Note that patterns of PSP slopes do not have the same pattern  
743 as spike transmission probability, since there are other factors (e.g. postsynaptic spiking history)  
744 contributing to postsynaptic spiking. However, as with spike transmission, we find that the PSP  
745 amplitudes are stimulus-dependent and that a static GLM without STP cannot account for these  
746 variations. Additionally, although the correlation is not perfect, the individual coupling effects in  
747 the model do correlate with the measured PSP slope, even though the model is only fit to spikes.  
748 By modeling dynamic functional connectivity, we can approximately reconstruct the amplitude of  
749 individual synaptic events.

750 We then analyze how much the TM-GLM can generalize to other stimulus types when fit to one  
751 stimulus type. We find that, although the model can describe the spike transmission patterns for  
752 all three stimuli when fit to all stimuli, the model does not generalize to natural stimuli when fit  
753 exclusively to one of the other stimulus types (and vice versa, Fig. 6D). The parameters from each  
754 of these models are distinct – occupying different regions of the parameter space. Notably, the  
755 model fit to all stimuli has a lower release probability and a higher facilitation time-constant  
756 compared to the models fit to individual stimuli (Fig. 6E).

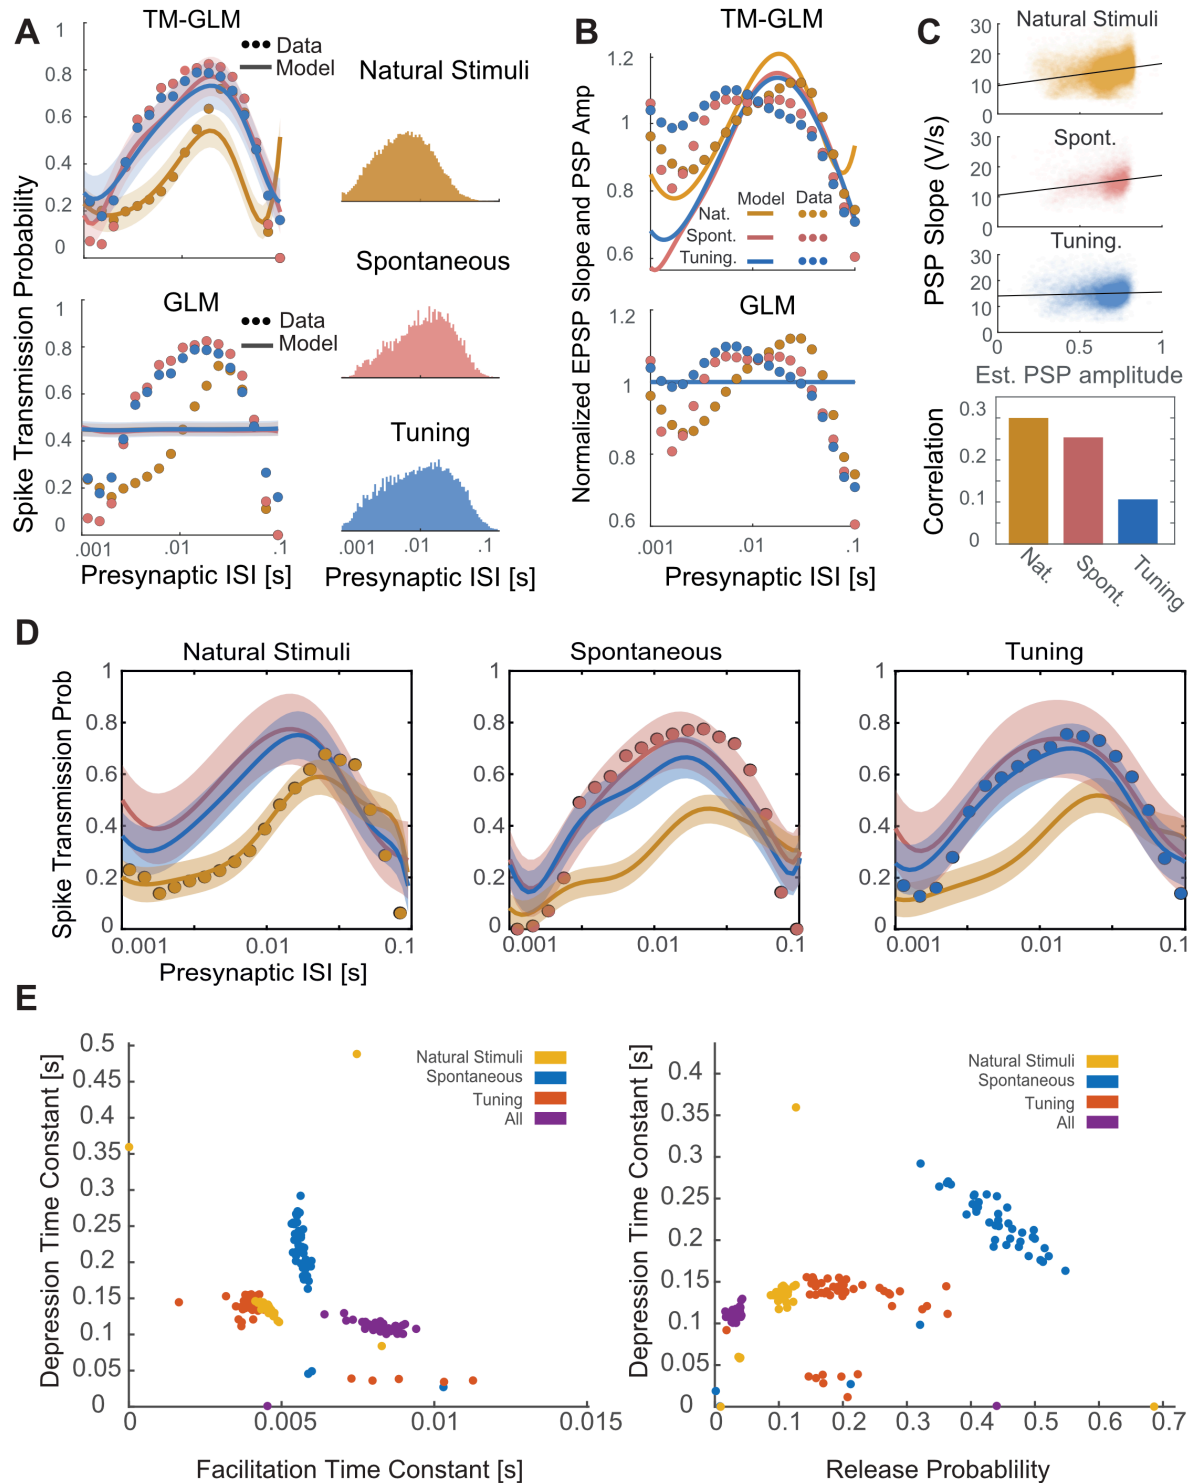

757  
 758 **Fig. 6: The TM-GLM captures stimulus-dependent changes in spike transmission**  
 759 **probability at the ANF-SBC synapse.** A) The TM-GLM captures stimulus-dependent spike  
 760 transmission probability patterns better than a static model without short-term synaptic plasticity. Dots  
 761 show spike transmission probability for (log-spaced) presynaptic ISIs during two types of auditory stimuli

762 and during spontaneous activity: Natural Sounds (yellow), Spontaneous Activity (red), and Tuning Stimuli  
763 (blue). Solid lines and 95% confidence bands show model predictions for each stimulus type.  
764 Corresponding inter-spike interval distributions are shown on the right. **B)** The TM-GLM captures changes  
765 in extracellularly recorded PSPs. Here the observed PSP slope (dots) approximately matches the coupling  
766 term in the TM-GLM (solid lines) for each three stimuli. Although the spike transmission probability of the  
767 static GLM can vary as a function of presynaptic ISI due to non-synaptic factors, the coupling term is fixed.  
768 **C)** Estimates of individual PSP amplitudes predicted by the model and their PSP slopes in the juxtacellular  
769 recording. Black lines denote linear fits and the bar plot shows the corresponding Spearman correlations.  
770 **D)** After fitting each stimuli condition separately, in each column we plotted the estimated spike  
771 transmission probability of each type using the estimated STP parameters of others. **E)** Distribution of  
772 parameters from bootstrap samples with the TM-GLM fit for individual stimuli and all stimuli combined.

773

774

### 775 **Postsynaptic cell-type specific changes in spike transmission patterns**

776 We also applied our model to spiking data from a large-scale multi-electrode array recording to  
777 investigate the spike transmission dynamics in synapses from putative excitatory neurons to two  
778 different putative inhibitory subtypes. We detected putative synapses using the log-likelihood ratio  
779 ( $LLR < -6$ ,  $\sim 200$  synapses) between a full model of the correlogram that includes the synaptic  
780 effect and smooth model of the correlogram that only captures the slow structure (see Methods).  
781 We then found excitatory-inhibitory microcircuits where putative excitatory neurons (based on the  
782 cross-correlogram and spike waveform) give inputs to putative inhibitory neurons (41 excitatory  
783 synapses onto 9 inhibitory neurons in total). To identify inhibitory neurons as inhibitory, we  
784 required the neuron to have an outgoing connection to a third neuron with a fast, transient decrease  
785 in the cross-correlogram. Each of the 9 putative inhibitory neurons here had at least one outgoing  
786 connection where the spiking probability of a downstream neuron decreases  $>18\%$  relative to  
787 baseline following its spiking (Fig. 7A). We then categorized each neuron as a putative fast-spiking  
788 (FS,  $n=5$ ) or regular-spiking (RS,  $n=4$ ) unit based on the spike waveform and firing rate (Fig. 7B).  
789 Putative FS units had narrow-width spike waveforms (half-width of the trough =  $0.08 \pm 0.02$  ms)  
790 and higher firing rates ( $26.07 \pm 9.6$  Hz) compared to putative RS neurons ( $n=4$ ) with broader  
791 waveforms (half-width =  $0.14 \pm 0.02$  ms) and lower firing rate ( $10.18 \pm 10.01$  Hz).

792 We identified these microcircuits in different regions with 4 putative excitatory-inhibitory  
793 microcircuits recorded in hippocampus (depth differences:  $77.2 \pm 49.4 \mu\text{m}$ ), 3 in thalamus  
794 ( $49.4 \pm 26.2 \mu\text{m}$ ), and 2 in motor cortex ( $36.4 \pm 23.5 \mu\text{m}$ ). Putative excitatory neurons showed a  
795 wide spike waveform (half-width =  $0.18 \pm 0.04$  ms) similar to the putative regular-spiking  
796 inhibitory neurons, but these two classes can be distinguished by their outgoing connection types  
797 (e.g. inhibitory/excitatory) (Moore and Wehr, 2013) (Fig. 7B). Average efficacies from putative  
798 excitatory-FS connections ( $0.22 \pm 0.12$ ,  $n=22$ ) were larger, on average, compared to putative



799 excitatory-RS efficacies ( $0.13 \pm 0.13$ ,  $n=19$ ). We then fit the TM-GLM to data from these 41  
800 putative synapses, similar to the three identified synapses analyzed above. Again, due to omitted  
801 variable bias, the interpretation of the parameter values for the model fits is not necessarily straight-  
802 forward. However, we find that there is substantial overlap between the estimated STP parameters  
803 for excitatory connections onto these two inhibitory subtypes (Fig. 7C). The depression time-  
804 constant for excitatory-RS connections is  $215 \pm 219$  ms (mean  $\pm$  SD, median 96 ms) and for  
805 excitatory-FS is  $411 \pm 459$  ms (median 191 ms). The facilitation time-constant for excitatory-RS  
806 connections is  $820 \pm 745$  ms (median 588 ms) and  $406 \pm 552$  ms (median 236 ms) for excitatory-  
807 FS connections. And the membrane time-constant for excitatory-RS connection is  $84 \pm 116$  ms  
808 compared to  $72 \pm 196$  ms for excitatory-FS. Interestingly, the estimates for membrane time-  
809 constant (median 10 ms for FS, 45 ms for RS) are similar to the parameters measured using  
810 intracellular recordings *in vitro* (Perrenoud et al., 2013).

811 Previous *in vitro* studies of postsynaptic cell-type specific STP concluded that putative excitatory-  
812 RS connections show facilitation and putative excitatory-FS connections show depression  
813 (Thomson and Lamy, 2007). Moreover, few *in vivo* studies characterized stimulated activities in  
814 these connections (Pala and Petersen, 2015, 2018; Sedigh-Sarvestani and Vigeland, 2017). A cell-  
815 type-specific study of somatosensory connections *in vivo* using 50Hz optogenetic stimulation  
816 found little short-term plasticity in connections to Parvalbumin-expressing neurons (putative  
817 excitatory-FS here), while excitatory to Somatostatin-expressing neurons (putative excitatory-RS  
818 here) showed facilitation (Pala and Petersen, 2015). However, we are not aware of any *in vivo*  
819 experiments that measured depression or facilitation time-constants for these systems during  
820 ongoing spiking activity. Here we find that both connection types are somewhat facilitating but  
821 excitatory-FS connections having a slightly shorter facilitation time-constant. However, unlike  
822 what would be expected if excitatory-FS connections were depressing, the release probability of  
823 excitatory-FS connections is lower than excitatory-RS connections (Fig. 7C,  $0.34 \pm 0.19$  for FS,  
824  $0.46 \pm 0.17$  for RS). To better understand synaptic transmission *in vivo* it is important to consider  
825 not just the parameters of the synapse but the full history of presynaptic spiking in the individual  
826 presynaptic neurons. We use the estimated model parameters to simulate responses to a train of  
827 regular presynaptic spikes with the frequency matched to the average firing rate of the  
828 corresponding excitatory input. In simulating postsynaptic responses to the spike train, we fix the  
829 excitability and postsynaptic history to their average values from model fits and set the initial STP  
830 state of the first spike in the train to the average  $R$  and  $u$  values from model fits. With these input-  
831 matched simulations, excitatory-RS connections show higher amplitude postsynaptic potentials  
832 compared to excitatory-FS connections (Fig. 7D, the effect of membrane potential integration is  
833 included). This is in accordance with the previously observed small degree of facilitation in  
834 connections to Somatostatin-expressing neurons and small degree of short-term plasticity in  
835 connections to Parvalbumin cells in (Pala and Petersen, 2015).

836 We also calculated spike transmission probabilities for all connections. On average, connections  
837 to regular-spiking inhibitory neurons show a higher spike transmission probability across  
838 interspike intervals (Fig. 7E). For all connections, we then evaluated the spike prediction accuracy  
839 of a model without STP (e.g. static GLM) with our TM-GLM using the Area Under the ROC  
840 Curve (Fig. 7F). The model with STP (TM-GLM) gives more accurate predictions for which  
841 presynaptic spikes will lead to postsynaptic spiking for our population of 41 putative excitatory-  
842 inhibitory connections ( $AUC=.69\pm.05$ ) in comparison with the static GLM ( $AUC=.50\pm.03$ ).  
843 Altogether, these results illustrate how a dynamic model of functional connectivity, such as the  
844 TM-GLM, can provide a detailed functional description of the short-term dynamics of spike  
845 transmission in awake, behaving animals.

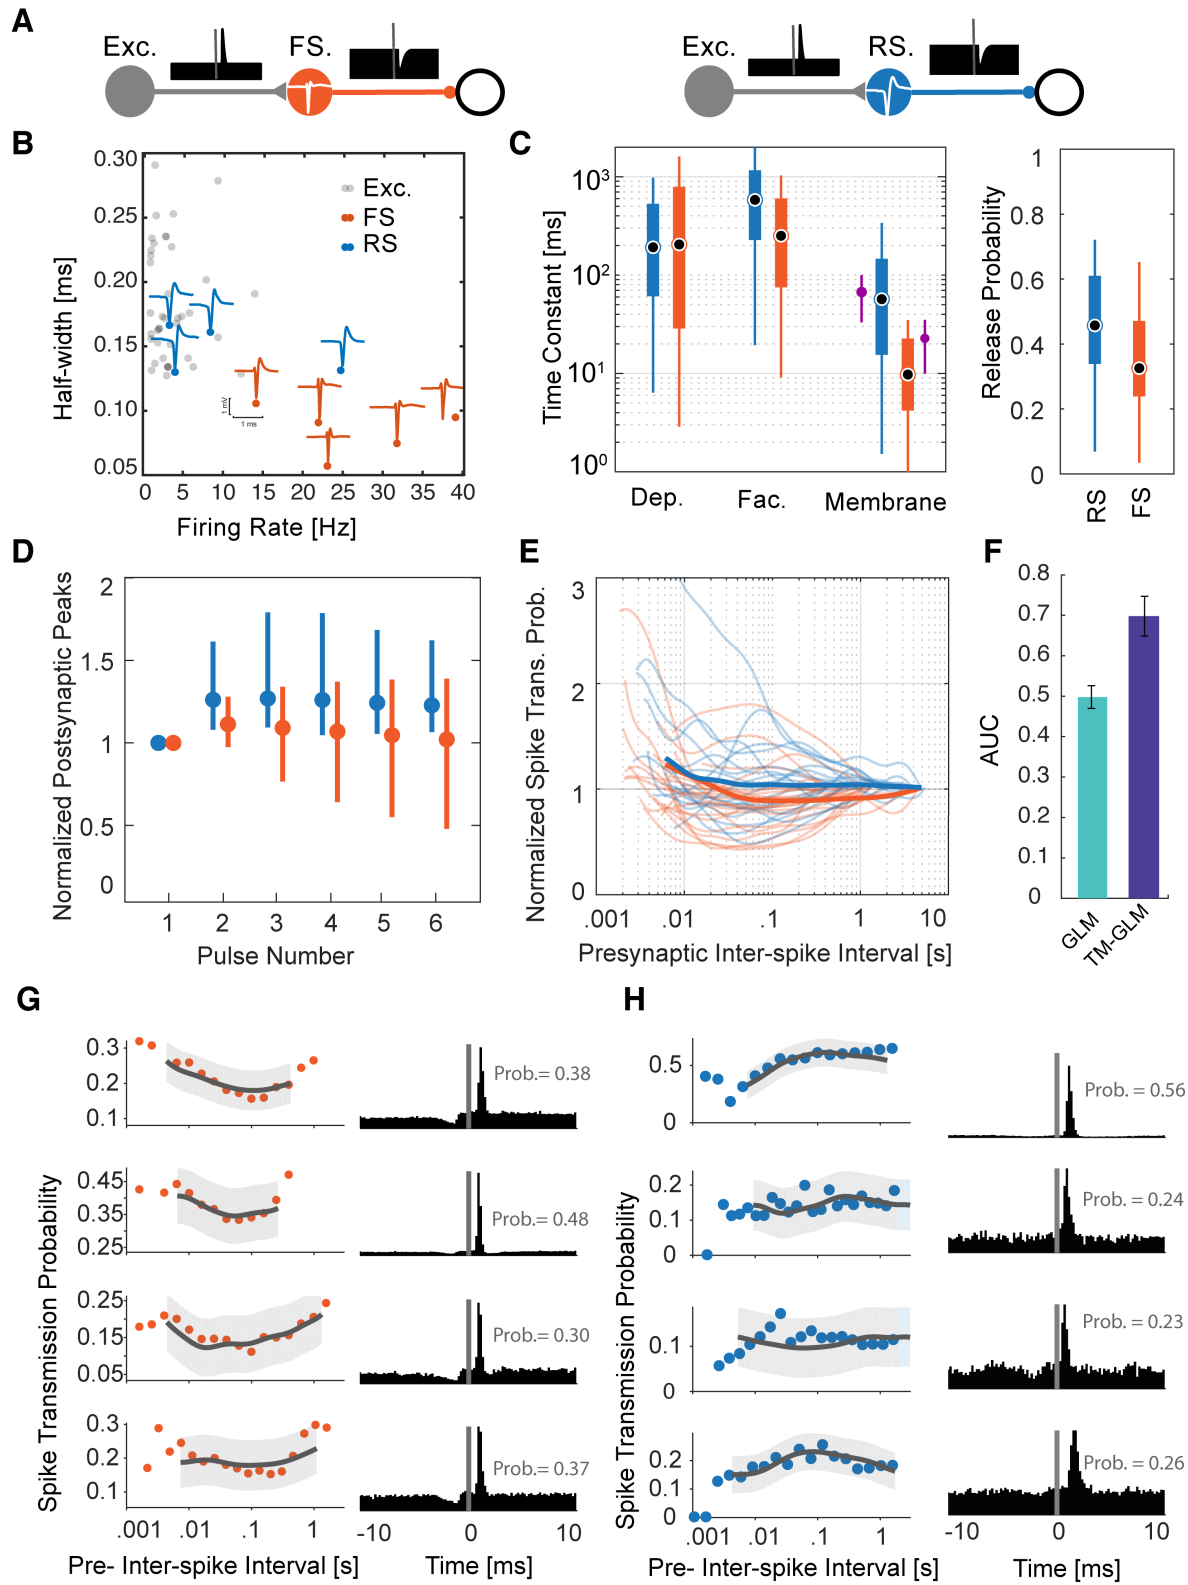

846

847 **Fig. 7: Distinctive short-term dynamics for spike transmission in connections between excitatory**  
 848 **neurons to putative Regular-Spiking (RS) and Fast-Spiking (FS) inhibitory neurons.** A) Here we  
 849 examine putative synapses between excitatory neurons and inhibitory neurons (identified by their cross-  
 850 correlations) and separate the putative inhibitory neurons into two classes: fast-spiking, which have narrow  
 851 spike waveforms and high rates (left), and regular-spiking (right), which have wide waveforms and lower  
 852 rates. Identifying these synapses requires both finding both a putative excitatory input and a putative  
 853 inhibitory output for the same neuron. B) Half-widths (of the trough) of the spike waveforms and firing  
 854 rates for the FS (orange) and RS (blue) inhibitory neurons, as well as, their excitatory inputs (grey).  
 855 Individual blue and orange waveforms (maximum amplitude across the MEA) are shown for all 9 putative  
 856 inhibitory neurons. C) Estimated depression, facilitation, and membrane time-constants for excitatory-RS  
 857 and excitatory-FS connections, along with the release probability (right). The purple error-bar next to the  
 858 membrane time-constant estimations show the median and standard deviations from *in vitro* experiments  
 859 (Perrenoud et al., 2013). D) Simulated postsynaptic potential amplitudes estimated from Tsodyks-Markram  
 860 model of short-term synaptic plasticity using estimated parameters. For each synapse, PSPs are estimated  
 861 in response to a pulse train with inter-pulse intervals set to their corresponding average presynaptic inter-  
 862 spike intervals. Dots and error bars denote the median and inter-quartile range for excitatory-RS (blue) and  
 863 excitatory-FS (red) connections. These responses include the effect of membrane potential integration. E)  
 864 Spike transmission probability patterns for individual synapses of excitatory-RS (blue) and excitatory-FS  
 865 (red) connections normalized by long interval probabilities as a function of the presynaptic ISI. F) Area  
 866 Under the Curve (AUC) of postsynaptic spiking prediction using the static GLM without short-term  
 867 synaptic plasticity (green) and the TM-GLM with short-term synaptic plasticity (blue). G-H) Spike-  
 868 transmission probabilities (left) and corresponding cross-correlograms (right) of 4 putative excitatory inputs  
 869 to putative FS (G) and RS (H) inhibitory neurons show cell-type specific similarities.

870

| Synapse       | $n$ | $\tau_s$ (ms)   | $\tau_d$ (ms) | $\tau_f$ (ms) | $U$               |
|---------------|-----|-----------------|---------------|---------------|-------------------|
| Thalamus      | 1   | 14 $\pm$ 2      | 410 $\pm$ 107 | 37 $\pm$ 12   | 0.29 $\pm$ 0.04   |
| VB-Barrel     | 1   | 0.3 $\pm$ 0.003 | 182 $\pm$ 8   | 105 $\pm$ 9   | 0.10 $\pm$ 0.05   |
| ANF-SBC       | 1   | 0.25 $\pm$ 0.02 | 67 $\pm$ 6    | 71 $\pm$ 3    | 0.068 $\pm$ 0.006 |
| excitatory-RS | 19  | 84 $\pm$ 116    | 215 $\pm$ 219 | 820 $\pm$ 745 | 0.46 $\pm$ 0.17   |
| excitatory-FS | 22  | 72 $\pm$ 196    | 411 $\pm$ 459 | 406 $\pm$ 552 | 0.34 $\pm$ 0.19   |

871 **Table 2: Summary of parameter estimates from the full TM-GLM.** Sample size ( $n$ ), membrane  
 872 time-constant ( $\tau_s$ ), depression time-constant ( $\tau_d$ ), and facilitation time-constant ( $\tau_f$ ), and release  
 873 probabilities ( $U$ ) for the identified and putative synapses from our three case studies and multi-  
 874 electrode recordings. For the cases studies, the mean $\pm$ standard deviation is shown for the bootstrap  
 875 samples. For the MEA data, the mean $\pm$ sd is shown across putative connections. In all cases, the  
 876 parameters are estimated from ongoing, in vivo spiking activity.

877

## 878 **Spike “transmission” patterns between unconnected pairs of neurons**

879 It is important to note that the dynamic functional connectivity model presented here assumes that,  
880 before fitting the model, we have accurately identified a monosynaptic connection. In some  
881 settings, it is possible to identify connections using optogenetic stimulation (English et al., 2017)  
882 or juxtacellular recording, however, in cases where we can only identify putative connections, it  
883 is important to consider the possibility that we are modeling a spurious correlation between  
884 neurons that are not actually monosynaptically connected. In general, the detection of  
885 monosynaptic connections from multielectrode spiking activity is far from perfect (Kobayashi et  
886 al., 2019).

887 To examine how the TM-GLM might be influenced by spurious correlations, we first simulated a  
888 small circuit with common drive that would likely lead to a falsely detected monosynaptic  
889 connection (Fig 8A). Here an unobserved presynaptic (inhomogeneous Poisson process) neuron  
890 provides strong excitatory input to two leaky integrate-and-fire postsynaptic neurons. Due to a  
891 difference in the latencies of these connections, there is a spurious peak in the correlogram between  
892 the two postsynaptic neurons where one postsynaptic neuron appears to excite the other. We find  
893 that when we measure the amplitude of this spurious peak, there are some variations as a function  
894 of the presumed presynaptic neuron’s ISI, and the spike “transmission” pattern varies depending  
895 on whether the projections from the true presynaptic are both depressing, both facilitating, or a  
896 mixture of depressing and facilitating (Fig 8B). However, the TM-GLM is nearly constant (~0.1%  
897 variation) and does not accurately fit the observed variation. Despite a spurious correlation, the  
898 detailed pattern of spikes between the two postsynaptic neurons is unstructured and not well  
899 described by the TM model.

900 We also fit the TM-GLM to several (n=38) pairs of neurons from the MEA data all with average  
901 firing rates in range of 3-15 Hz and where there was no clear peak in the cross-correlogram (0-  
902 5ms following the spikes of one neurons). In these cases, although the coupling filter is likely  
903 fitting noise and does not describe a realistic synaptic effect (median latency 0.7 ms, median time-  
904 constant 0.02 ms), the TM-GLM does describe small variations in the ISI-dependent pattern of  
905 spike “transmission” probability (Fig 8C). These patterns are not as pronounced as the patterns  
906 observed in the identified and putative monosynaptic connections described above, but they also  
907 appear to have structure that the TM-GLM can account for. Altogether, these results illustrate how  
908 the TM-GLM simply aims to account for short-term dynamics in the spiking probability of one  
909 neuron in reference to the spikes of another neuron. Correctly identifying monosynaptic  
910 connections is a necessary first step before the short-term dynamics can be meaningfully  
911 interpreted.

912

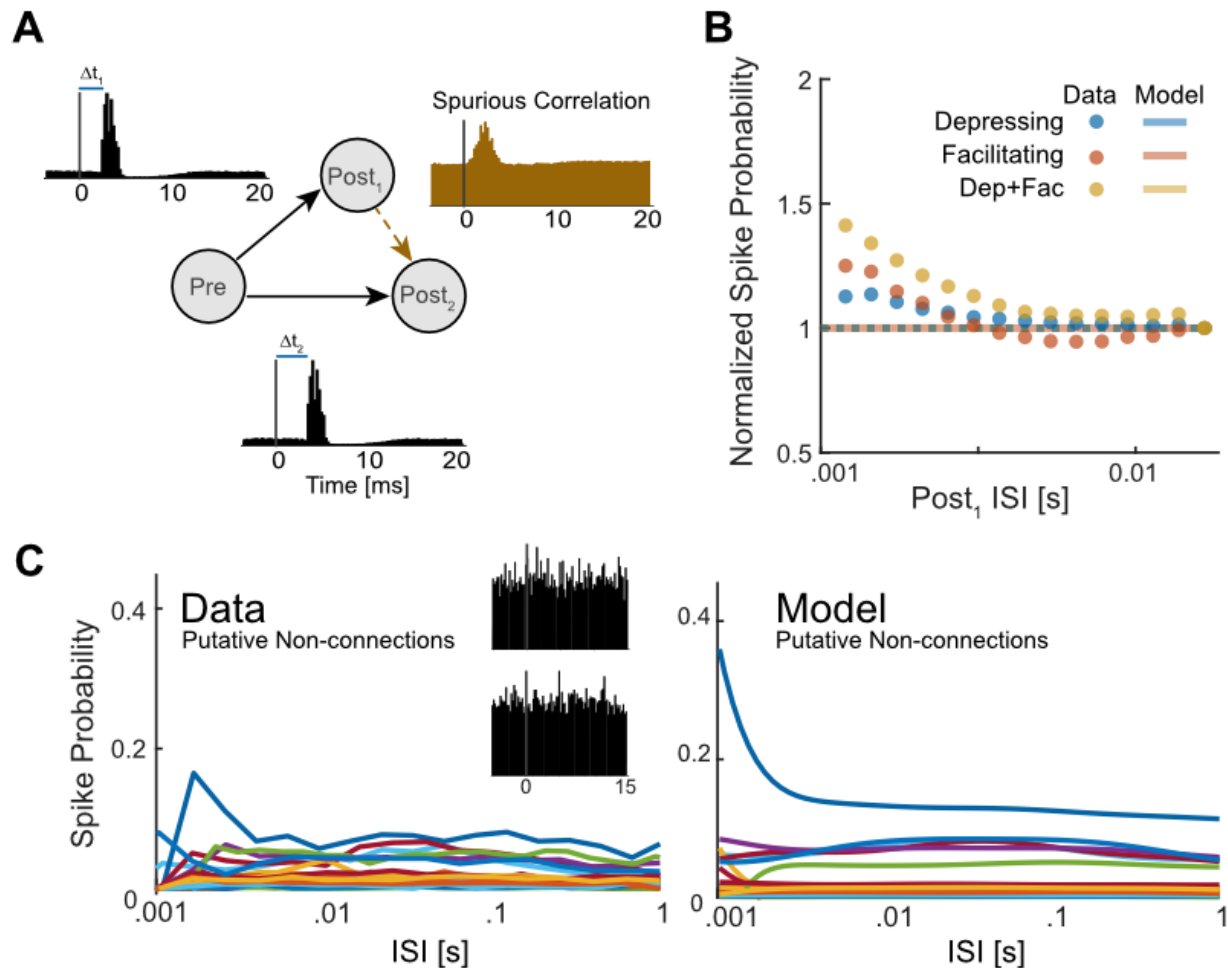

913

914 **Fig. 8: Short-term changes in spike probability for neurons that are not monosynaptically**  
 915 **connected.** A) In a simulated circuit, we generated a spurious connection between two neurons  
 916 (Post<sub>1</sub> and Post<sub>2</sub>) receiving common excitatory drive from a single presynaptic neuron (Pre) with  
 917 different delays (orange cross-correlogram) B) Scatter plots show normalized spike “transmission”  
 918 probabilities from different sets of simulations where the true connections to the postsynaptic  
 919 neurons have different types of short-term synaptic plasticity (both Depressing, both Facilitating,  
 920 and one Depressing; one Facilitating). Lines with same colors as scatter plots show the estimated  
 921 spike probability from the TM-GLM. Here the data and model fits are averaged across 150 rounds  
 922 of simulations (50 for each combination) and are normalized in order to have a spiking probability  
 923 of 1 for the longest ISIs C) We then fit spike “transmission” probability for 38 pairs of neurons  
 924 from the multi-electrode array (MEA) recording where there was no clear monosynaptic  
 925 connection (putative non-connections). Observed (left) spike transmission probabilities show  
 926 relatively little variation as a function of one neuron’s ISIs, but the TM-GLM (right) does describe



927 what variation there is. Insets show example cross-correlograms from two of these putative non-  
928 connections.

929

## 930 **Discussion**

931 Here we developed a dynamic model of functional connectivity, the TM-GLM, and applied this  
932 model to disentangle synaptic and nonsynaptic contributions to excitatory spike transmission in  
933 vivo. Short-term synaptic plasticity (STP) has been extensively studied with intracellular  
934 recordings where the amplitudes of individual postsynaptic potential/currents (PSP/PSCs) can be  
935 directly measured. However, the relationship between STP and *in vivo* spike transmission patterns  
936 is complex. Patterns of postsynaptic spike transmission are highly diverse and multiple factors  
937 beyond STP shape these patterns (Swadlow and Gusev, 2001; English et al., 2017). Here, using a  
938 model-based approach, we characterized these diverse spike transmission patterns at identified and  
939 putative excitatory synapses and attribute this diversity to different combinations of short-term  
940 synaptic plasticity, synaptic summation, and post-spike history effects. We then showed how this  
941 modeling framework has the potential to capture stimulus-specific and cell-type-specific changes  
942 in spike transmission *in vivo*.

943 Estimating static functional connectivity using spike times has revealed network structure in the  
944 retina (Pillow et al., 2008) and hippocampus (Harris et al., 2003), can reconstruct true  
945 physiological circuitry (Gerhard et al., 2013), and improves encoding and decoding (Truccolo et  
946 al., 2005; Pillow et al., 2008; Stevenson et al., 2012). However, synaptic weights can change  
947 dramatically over time and can also depend on external stimuli and behavior (Fujisawa et al.,  
948 2008). Although, standard GLMs can partially capture the first-order effects of recent presynaptic  
949 spikes on postsynaptic spiking probability, they fail to capture the nonlinear dynamics of synaptic  
950 transmission affected by longer sequences of presynaptic spikes. With a static coupling term the  
951 GLM can account for the average change in the postsynaptic spiking probability following a  
952 presynaptic spike, but it does not make detailed predictions about the variations in this probability.  
953 Here we show that, by including a dynamical model of short-term plasticity, we can capture diverse  
954 pattern of spike transmission probability and substantially improve prediction of postsynaptic  
955 spiking. In a recording from the endbulb of Held (ANF-SBC) we further found that spike  
956 transmission patterns differed between stimuli, and that these differences were well-described by  
957 a single TM-GLM. Although the STP-parameters were the same for all stimuli, the different  
958 presynaptic spike patterns yield different patterns of spike transmission. Since spike transmission  
959 probability in the TM-GLM depends on the full history of presynaptic spiking, this model can  
960 account for changes on behavioral timescales even in the absence of adaptation or other forms of  
961 plasticity (e.g. STDP, LTP). Using the models for the short-term dynamics of spike transmission

962 estimated in one setting we may also be able to more accurately predict responses to novel  
963 presynaptic patterns and, in sensory systems, novel stimuli.

964 Previous *in vitro* studies have shown that STP dynamics depend on both presynaptic and  
965 postsynaptic cell-types (Thomson and Lamy, 2007). Using a large multi-electrode recording from  
966 a freely behaving mouse, we investigated the dynamics of synaptic connections from putative  
967 excitatory neurons to two different subtypes of putative inhibitory neurons: putative fast-spiking  
968 (FS) and putative regular-spiking (RS). Using only spike times, we find that spike transmission  
969 shows slightly higher facilitation for excitatory-RS compared to the excitatory-FS connections.  
970 Although drawing strong conclusions about the parameters of the model is difficult due to potential  
971 confounds, the STP dynamics reflect this same pattern and are in line with previous *in vitro*  
972 findings (Thomson and Lamy, 2007). Including short-term dynamics into the model also  
973 significantly improves the prediction of postsynaptic spiking. As large-scale extracellular  
974 recording techniques advance, models such as the TM-GLM may allow us to characterize and  
975 compare the short-term dynamics of spike transmission of many different cell types, brain regions,  
976 and species.

977 Several details of the model may impact our results. Here we employed an extended GLM with a  
978 logistic spike nonlinearity, since it appears to better describe strong connections, such as the ANF-  
979 SBC, better than the traditional exponential nonlinearity. However, other nonlinearities may be  
980 better for other neurons (McFarland et al., 2013). There are also alternatives to the Tsodyks-  
981 Markram model for modeling synaptic dynamics (Hennig, 2013). Although the TM model is  
982 biologically plausible, it only tracks average, deterministic dynamics of postsynaptic potentials,  
983 while ignoring the stochasticity of synaptic release (Barri et al., 2016; Bird et al., 2016). Finally,  
984 there are many covariates that could be added to improve model performance, including local field  
985 potentials (Kelly et al., 2010), connections to other simultaneously observed presynaptic neurons  
986 (Harris et al., 2003), higher-order history or coupling terms (Robinson et al., 2016; Song et al.,  
987 2018), and covariates related to other types of plasticity (Stevenson et al., 2011; Linderman et al.,  
988 2014; Robinson et al., 2016; Amidi et al., 2018; Bayat Mokhtari et al., 2018). Despite these  
989 simplifying assumptions and the fact that we only observe a fraction of inputs to the neuron, the  
990 TM-GLM captures a wide diversity of *in vivo*, excitatory spike transmission patterns.

991 Although our model provides a tool to characterize the dynamics of spike transmission, there may  
992 be fundamental limitations to how well true synaptic dynamics can be estimated from spike  
993 observations. Firstly, functional connections inferred from spikes do not necessarily guarantee  
994 anatomical connections. A peak in the cross-correlogram does not conclusively indicate the  
995 presence of a monosynaptic connection (Moore et al., 1970). In most cases, we assume that the  
996 transient, short-latency increase in postsynaptic spiking activity following a presynaptic spike  
997 indicates the presence of an excitatory monosynaptic connection (Perkel et al., 1967).  
998 Nevertheless, verifying connections using optogenetics (English et al., 2017), juxtacellular

999 recordings (Pinault, 2011), or imaging (Weiler et al., 2008) may provide more confidence in  
1000 determining true monosynaptic connections. Secondly, we employ a spiking model that does not  
1001 explicitly account for the detailed membrane potential of the postsynaptic neuron. Although there  
1002 are links between the GLM and voltage-based models (Latimer et al., 2014, 2018), other  
1003 approaches to modeling synaptic transmission with realistic spike-generation mechanisms,  
1004 currents, and even dendritic morphology may more accurately reflect subthreshold dynamics  
1005 (Ladenbauer et al., 2018). Thirdly, long-term changes in the synaptic weight may alter the short-  
1006 term dynamics. Experiments show that short-term depression may be reduced after long-term  
1007 depression and increased after long-term potentiation (Markram and Tsodyks, 1996; Sjöström et  
1008 al., 2007; Costa et al., 2015, 2017). Accounting for these long-term changes in synaptic strength  
1009 may allow for more accurately estimation of STP. Finally, there are many other factors that are  
1010 likely to affect short-term spike transmission dynamics including, dendritic spikes (Bono and  
1011 Clopath, 2017), receptors nonlinearities (Magee, 2000), such as those in NMDA receptors, changes  
1012 in spike threshold due to sodium inactivation (Naud et al., 2011) or coupled to the subthreshold  
1013 activity (Mensi et al., 2016), feed-forward inhibition (Pouille and Scanziani, 2001), feedback  
1014 inhibition (Suzuki and Bekkers, 2012), or disinhibition (Letzkus et al., 2015). With intracellular  
1015 observations these effects can generally be separated from the synaptic dynamics based on the  
1016 timing of the signals. However, since these effects directly alter spike timing, they may act as  
1017 confounders for models based on spike observations. Although they could potentially be  
1018 incorporated in future models, omitting these effects from the model presented here may result in  
1019 biased parameter estimates for both the synaptic and non-synaptic effects that are included  
1020 (Stevenson, 2018).

1021 Intracellular observations in controlled settings have found that short-term synaptic dynamics vary  
1022 depending on the pre- and postsynaptic cell type (Thomson and Lamy, 2007; Lee et al., 2019) as  
1023 well as brain region (Dittman et al., 2000; Wang et al., 2006), age (Reyes et al., 1998), and species  
1024 (Testa-Silva et al., 2014). Additionally, short-term synaptic dynamics appear to vary with stimulus  
1025 type and the larger computational function of the neural circuit (Karmarkar and Buonomano,  
1026 2007). To link synaptic dynamics to circuit-level neural computations we will need to study these  
1027 dynamics during natural ongoing activity (Klyachko and Stevens, 2006) and ultimately during  
1028 natural behavior. Since short-term synaptic plasticity affects not only the postsynaptic membrane  
1029 potential but also the probability of postsynaptic spiking (Markram et al., 1998; Swadlow and  
1030 Gusev, 2001; London et al., 2002; English et al., 2017), it may be possible to indirectly observe  
1031 the effects of synaptic dynamics on spike transmission. Here we examined this possibility by  
1032 including the effects of short-term synaptic plasticity in models of functional connectivity. Using  
1033 this approach, we characterized diverse, stimulus-dependent, and cell-type-specific patterns of  
1034 excitatory spike transmission using spike observations alone.

### 1035 **Data and software availability**

1036 All data and software central to the conclusion of this study are available at  
1037 <https://github.com/abedghanbari2/TM-GLM>.

## 1038 **Acknowledgements**

1039 Thanks to Nick Steinmetz for providing MEA dataset. AG, NR, and IHS were supported by NSF  
1040 CAREER 1651396 to IHS. BE was partially funded via an NWO Open Grant (ALWOP.346) and  
1041 an NWO VIDI grant (016.Vidi.189.052).

## 1042 **References**

- 1043 Abbott LF, Regehr WG (2004) Synaptic computation. *Nature*.
- 1044 Amidi Y, Nazari B, Sadri S, ... UE-2018 40th A, 2018 U (2018) Parameter Estimation in Synaptic  
1045 Coupling Model Using a Point Process Modeling Framework\*. *ieeexplore.ieee.org*.
- 1046 Barri A, Wang Y, Hansel D, Mongillo G (2016) Quantifying Repetitive Transmission at Chemical  
1047 Synapses: A Generative-Model Approach. *eNeuro* 3:Suppl:1-40.
- 1048 Barthó P, Hirase H, Monconduit L, Zugaro M, Harris KD, Buzsáki G (2004) Characterization of  
1049 neocortical principal cells and interneurons by network interactions and extracellular features.  
1050 *J Neurophysiol* 92:600–608.
- 1051 Bayat Mokhtari E, Lawrence JJ, Stone EF (2018) Data Driven Models of Short-Term Synaptic  
1052 Plasticity. *Front Comput Neurosci*.
- 1053 Bird AD, Wall MJ, Richardson MJE (2016) Bayesian Inference of Synaptic Quantal Parameters  
1054 from Correlated Vesicle Release. *Front Comput Neurosci* 10:116.
- 1055 Bono J, Clopath C (2017) Modeling somatic and dendritic spike mediated plasticity at the single  
1056 neuron and network level. *Nat Commun* 8:706.
- 1057 Boyd S, Vandenberghe L (2004) Convex optimization. Cambridge university press.
- 1058 Bykowska O, Gontier C, Sax A-L, Jia DW, Montero ML, Bird AD, Houghton C, Pfister J-P, Costa  
1059 RP (2019) Model-Based Inference of Synaptic Transmission. *Front Synaptic Neurosci* 11:21  
1060 Available at: <https://www.frontiersin.org/article/10.3389/fnsyn.2019.00021/full> [Accessed  
1061 February 17, 2020].
- 1062 Carandini M, Horton JC, Sincich LC (2007) Thalamic filtering of retinal spike trains by  
1063 postsynaptic summation. *J Vis* 7:20.
- 1064 Costa RP, Froemke RC, Sjöström PJ, van Rossum MCW (2015) Unified pre- and postsynaptic  
1065 long-term plasticity enables reliable and flexible learning. *Elife* 4:1–16.
- 1066 Costa RP, Mizusaki BEP, Sjöström PJ, van Rossum MCW (2017) Functional consequences of  
1067 pre- and postsynaptic expression of synaptic plasticity. *Philos Trans R Soc B Biol Sci* 372.
- 1068 Costa RP, Sjöström PJ, van Rossum MCW (2013) Probabilistic inference of short-term synaptic  
1069 plasticity in neocortical microcircuits. *Front Comput Neurosci* 7:75 Available at:  
1070 <http://journal.frontiersin.org/article/10.3389/fncom.2013.00075/abstract> [Accessed February

- 1071 17, 2020].
- 1072 Csicsvari J, Hirase H, Czurko A, Buzsáki G (1998) Reliability and state dependence of pyramidal  
1073 cell-interneuron synapses in the hippocampus: An ensemble approach in the behaving rat.  
1074 *Neuron* 21:179–189.
- 1075 Dittman JS, Kreitzer AC, Regehr WG (2000) Interplay between facilitation, depression, and  
1076 residual calcium at three presynaptic terminals. *J Neurosci*.
- 1077 English DF, McKenzie S, Evans T, Kim K, Yoon E, Buzsáki G (2017) Pyramidal Cell-Interneuron  
1078 Circuit Architecture and Dynamics in Hippocampal Networks. *Neuron* 96:505–520.
- 1079 Fetz E, Toyama K, Smith W (1991) Synaptic Interactions between Cortical Neurons. In, pp 1–47.
- 1080 Fetz EE, Gustafsson B (1983) Relation between shapes of post-synaptic potentials and changes in  
1081 firing probability of cat motoneurons. *J Physiol* 341:387–410.
- 1082 Fujisawa S, Amarasingham A, Harrison MT, Buzsáki G (2008) Behavior-dependent short-term  
1083 assembly dynamics in the medial prefrontal cortex. *Nat Neurosci*.
- 1084 Gerhard F, Kispersky T, Gutierrez GJ, Marder E, Kramer M, Eden U (2013) Successful  
1085 Reconstruction of a Physiological Circuit with Known Connectivity from Spiking Activity  
1086 Alone. *PLoS Comput Biol* 9.
- 1087 Ghanbari A, Malyshev A, Volgushev M, Stevenson IH (2017) Estimating short-term synaptic  
1088 plasticity from pre- and postsynaptic spiking. *PLOS Comput Biol* 13:e1005738 Available at:  
1089 <https://doi.org/10.1371/journal.pcbi.1005738>.
- 1090 Gil Z, Connors BW, Amitai Y (1997) Differential regulation of neocortical synapses by  
1091 neuromodulators and activity. *Neuron*.
- 1092 Harris K, Csicsvari J, Hirase H, Dragoi G, Buzsáki G (2003) Organization of cell assemblies in  
1093 the hippocampus. *Nature* 424:552–556.
- 1094 Hatsopoulos NG, Xu Q, Amit Y (2007) Encoding of movement fragments in the motor cortex. *J*  
1095 *Neurosci* 27:5105–5114.
- 1096 Hennig MH (2013) Theoretical models of synaptic short term plasticity. *Front Comput Neurosci*  
1097 7:45.
- 1098 Henze DA, Buzsáki G (2001) Action potential threshold of hippocampal pyramidal cells in vivo  
1099 is increased by recent spiking activity. *Neuroscience* 105:121–130.
- 1100 Herz AVM, Gollisch T, Machens CK, Jaeger D (2006) Modeling single-neuron dynamics and  
1101 computations: A balance of detail and abstraction. *Science* (80- ).
- 1102 Huang C, Resnik A, Celikel T, Englitz B (2016) Adaptive Spike Threshold Enables Robust and  
1103 Temporally Precise Neuronal Encoding. *PLoS Comput Biol*.
- 1104 Jun JJ et al. (2017) Fully integrated silicon probes for high-density recording of neural activity.  
1105 *Nature* 551:232–236.
- 1106 Karmarkar UR, Buonomano D V. (2007) Timing in the Absence of Clocks: Encoding Time in  
1107 Neural Network States. *Neuron*.



- 1108 Kawaguchi Y (2001) Distinct firing patterns of neuronal subtypes in cortical synchronized  
1109 activities. *J Neurosci*.
- 1110 Keine C, Rubsamen R, Englitz B (2016) Inhibition in the auditory brainstem enhances signal  
1111 representation and regulates gain in complex acoustic environments. *Elife* 5.
- 1112 Keine C, RübSamen R, Englitz B (2017) Signal integration at spherical bushy cells enhances  
1113 representation of temporal structure but limits its range. *Elife* 6.
- 1114 Kelly RC, Smith MA, Kass RE, Lee TS (2010) Local field potentials indicate network state and  
1115 account for neuronal response variability. *J Comput Neurosci* 29:567–579.
- 1116 Klyachko VA, Stevens CF (2006) Excitatory and feed-forward inhibitory hippocampal synapses  
1117 work synergistically as an adaptive filter of natural spike trains. *PLoS Biol* 4:1187–1200.
- 1118 Kobayashi R, Kurita S, Kurth A, Kitano K, Mizuseki K, Diesmann M, Richmond BJ, Shinomoto  
1119 S (2019) Reconstructing neuronal circuitry from parallel spike trains. *Nat Commun*.
- 1120 Ladenbauer J, McKenzie S, English DF, Hagens O, Ostojic S (2018) Inferring and validating  
1121 mechanistic models of neural microcircuits based on spike-train data. *bioRxiv Prepr*.
- 1122 Latimer KW, Chichilnisky EJ, Rieke F, Pillow JW (2014) Inferring synaptic conductances from  
1123 spike trains with a biophysically inspired point process model. *Neural Inf Process Syst*  
1124 27:954–962.
- 1125 Latimer KW, Rieke F, Pillow JW (2018) Inferring synaptic inputs from spikes with a conductance-  
1126 based neural encoding model. *bioRxiv:281089*.
- 1127 Lee JH, Campagnola L, Seeman SC, Jarsky T, Mihalas S (2019) Functional synapse types via  
1128 characterization of short-term synaptic plasticity. *bioRxiv:648725*.
- 1129 Letzkus JJ, Wolff SBE, Lüthi A (2015) Disinhibition, a Circuit Mechanism for Associative  
1130 Learning and Memory. *Neuron* 88:264–276.
- 1131 Linderman S, Stock C, Adams R (2014) A framework for studying synaptic plasticity with neural  
1132 spike train data. *Adv Neural Inf*.
- 1133 London M, Schreibman A, Häusser M, Larkum ME, Segev I (2002) The information efficacy of  
1134 a synapse. *Nat Neurosci* 5:332–340.
- 1135 Magee JC (2000) Dendritic integration of excitatory synaptic input. *Nat Rev Neurosci*.
- 1136 Markram H, Tsodyks M (1996) Redistribution of synaptic efficacy between neocortical pyramidal  
1137 neurons. *Nature* 382:807–810.
- 1138 Markram H, Wang Y, Tsodyks M (1998) Differential signaling via the same axon of neocortical  
1139 pyramidal neurons. *Proc Natl Acad Sci U S A* 95:5323–5328.
- 1140 McFarland JM, Cui Y, Butts DA (2013) Inferring Nonlinear Neuronal Computation Based on  
1141 Physiologically Plausible Inputs. *PLoS Comput Biol* 9.
- 1142 Mensi S, Hagens O, Gerstner W, Pozzorini C (2016) Enhanced Sensitivity to Rapid Input  
1143 Fluctuations by Nonlinear Threshold Dynamics in Neocortical Pyramidal Neurons. *PLoS*  
1144 *Comput Biol*.



- 1145 Moore AK, Wehr M (2013) Parvalbumin-Expressing Inhibitory Interneurons in Auditory Cortex  
1146 Are Well-Tuned for Frequency. *J Neurosci* 33:13713–13723.
- 1147 Moore GP, Segundo JP, Perkel DH, Levitan H (1970) Statistical Signs of Synaptic Interaction in  
1148 Neurons. *Biophys J* 10:876–900.
- 1149 Mora Lopez C, Putzeys J, Raducanu BC, Ballini M, Wang S, Andrei A, Rochus V, Vandebriel R,  
1150 Severi S, Van Hoof C, Musa S, Van Helleputte N, Yazicioglu RF, Mitra S (2017) A Neural  
1151 Probe with Up to 966 Electrodes and Up to 384 Configurable Channels in 0.13  $\mu\text{m}$  SOI  
1152 CMOS. *IEEE Trans Biomed Circuits Syst* 11:510–522.
- 1153 Naud R, Petersen CCH, Pozzorini C, Mensi S, Avermann M, Gerstner W (2011) Parameter  
1154 extraction and classification of three cortical neuron types reveals two distinct adaptation  
1155 mechanisms. *J Neurophysiol*.
- 1156 Pachitariu M, Steinmetz N, Kadir S, Carandini M, Harris KD (2016) Kilosort: realtime spike-  
1157 sorting for extracellular electrophysiology with hundreds of channels.
- 1158 Pala A, Petersen CC (2018) State-dependent cell-type-specific membrane potential dynamics and  
1159 unitary synaptic inputs in awake mice. *Elife*.
- 1160 Pala A, Petersen CCH (2015) In Vivo Measurement of Cell-Type-Specific Synaptic Connectivity  
1161 and Synaptic Transmission in Layer 2/3 Mouse Barrel Cortex. *Neuron* 85:68–75.
- 1162 Paz JT, Chavez M, Saillet S, Deniau J-M, Charpier S (2007) Activity of Ventral Medial Thalamic  
1163 Neurons during Absence Seizures and Modulation of Cortical Paroxysms by the  
1164 Nigrothalamic Pathway. *J Neurosci*.
- 1165 Perkel DH, Gerstein GL, Moore GP (1967) Neuronal spike trains and stochastic point processes.  
1166 II. Simultaneous spike trains. *Biophys J* 7:419–440.
- 1167 Perrenoud Q, Rossier J, Geoffroy H, Vitalis T, Gallopin T (2013) Diversity of gabaergic  
1168 interneurons in layer VIa and VIb of mouse barrel cortex. *Cereb Cortex*.
- 1169 Pillow JW, Shlens J, Paninski L, Sher A, Litke AM, Chichilnisky EJ, Simoncelli EP (2008) Spatio-  
1170 temporal correlations and visual signalling in a complete neuronal population. *Nature*  
1171 454:995–999 Available at: <http://www.nature.com/doi/10.1038/nature07140>.
- 1172 Pinault D (2011) The juxtacellular recording-labeling technique. *Neuromethods*.
- 1173 Poliakov A V, Powers RK, Sawczuk A, Binder MD (1996) Effects of background noise on the  
1174 response of rat and cat motoneurons to excitatory current transients. *J Physiol* 495:143–157.
- 1175 Pouille F, Scanziani M (2001) Enforcement of temporal fidelity in pyramidal cells by somatic  
1176 feed-forward inhibition. *Science* (80- ).
- 1177 Regehr WG (2012) Short-term presynaptic plasticity. *Cold Spring Harb Perspect Biol*.
- 1178 Reyes A, Lujan R, Rozov A, Burnashev N, Somogyi P, Sakmann B (1998) Target-cell-specific  
1179 facilitation and depression in neocortical circuits. *Nat Neurosci*.
- 1180 Robinson BS, Berger TW, Song D (2016) Identification of stable spike-timing-dependent  
1181 plasticity from spiking activity with generalized multilinear modeling. *Neural Comput*.
- 1182 Sedigh-Sarvestani M, Vigeland L (2017) Intracellular, In Vivo, Dynamics of Thalamocortical

- 1183 Synapses in Visual Cortex. *J.*
- 1184 Sjöström PJ, Turrigiano GG, Nelson SB (2007) Multiple forms of long-term plasticity at unitary  
1185 neocortical layer 5 synapses. *Neuropharmacology* 52:176–184.
- 1186 Song D, Robinson BS, Berger TW (2018) Identification of Short-Term and Long-Term Functional  
1187 Synaptic Plasticity From Spiking Activities. In: *Adaptive Learning Methods for Nonlinear*  
1188 *System Modeling*, pp 289–312. Elsevier.
- 1189 Stevenson IH (2018) Omitted Variable Bias in GLMs of Neural Spiking Activity. *Neural Comput.*
- 1190 Stevenson IH, Kording K, Koerding K (2011) Inferring spike-timing-dependent plasticity from  
1191 spike train data. In: *Advances in Neural Information Processing Systems* (Shawe-Taylor J,  
1192 Zemel RS, Bartlett P, Pereira FCN, Weinberger KQ, eds), pp 1–9.
- 1193 Stevenson IH, London BM, Oby ER, Sachs NA, Reimer J, Englitz B, David S V., Shamma SA,  
1194 Blanche TJ, Mizuseki K, Zandvakili A, Hatsopoulos NG, Miller LE, Kording KP (2012)  
1195 Functional Connectivity and Tuning Curves in Populations of Simultaneously Recorded  
1196 Neurons. *PLoS Comput Biol* 8:e1002775.
- 1197 Stevenson IH, Rebesco JM, Miller LE, Körding KP (2008) Inferring functional connections  
1198 between neurons. *Curr Opin Neurobiol* 18:582–588.
- 1199 Stoelzel CR, Bereshpolova Y, Gusev AG, Swadlow HA (2008) The Impact of an LGNd Impulse  
1200 on the Awake Visual Cortex: Synaptic Dynamics and the Sustained/Transient Distinction. *J*  
1201 *Neurosci.*
- 1202 Stoelzel CR, Bereshpolova Y, Swadlow HA (2009) Stability of Thalamocortical Synaptic  
1203 Transmission across Awake Brain States. *J Neurosci.*
- 1204 Suzuki N, Bekkers JM (2012) Microcircuits Mediating Feedforward and Feedback Synaptic  
1205 Inhibition in the Piriform Cortex. *J Neurosci* 32:919–931.
- 1206 Swadlow HA (2002) Thalamocortical control of feed-forward inhibition in awake somatosensory  
1207 “barrel” cortex. *Philos Trans R Soc Lond B Biol Sci* 357:1717–1727.
- 1208 Swadlow HA, Gusev AG (2001) The impact of “bursting” thalamic impulses at a neocortical  
1209 synapse. *Nat Neurosci* 4:402–408 Available at:  
1210 <http://www.ncbi.nlm.nih.gov/pubmed/11276231>.
- 1211 Swadlow HA, Gusev AG (2002) Receptive-field construction in cortical inhibitory interneurons.  
1212 *Nat Neurosci.*
- 1213 Testa-Silva G, Verhoog MB, Linaro D, de Kock CPJ, Baayen JC, Meredith RM, De Zeeuw CI,  
1214 Giugliano M, Mansvelder HD (2014) High Bandwidth Synaptic Communication and  
1215 Frequency Tracking in Human Neocortex. *PLoS Biol* 12.
- 1216 Thomson AM, Lamy C (2007) Functional maps of neocortical local circuitry. *Front Neurosci*  
1217 1:19–42.
- 1218 Thomson AM, West DC, Wang Y, Bannister AP (2002) Synaptic Connections and Small Circuits  
1219 Involving Excitatory and Inhibitory Neurons in Layers 2-5 of Adult Rat and Cat Neocortex:  
1220 Triple Intracellular Recordings and Biocytin Labelling In Vitro. *Cereb Cortex* 12:936–953.

- 1221 Truccolo W, Eden UT, Fellows MR, Donoghue JP, Brown EN, John P (2005) A Point Process  
1222 Framework for Relating Neural Spiking Activity to Spiking History, Neural Ensemble, and  
1223 Extrinsic Covariate Effects. *J Neurophysiol* 93:1074–1089.
- 1224 Tsodyks M, Pawelzik K, Markram H (1998) Neural networks with dynamic synapses. *Neural*  
1225 *Comput* 1998 May;10(4):821–835 835:821–835.
- 1226 Tsodyks M V., Markram H (1997) The neural code between neocortical pyramidal neurons  
1227 depends on neurotransmitter release probability. *Proc Natl Acad Sci* 94:719–723.
- 1228 Usrey WM, Alonso JM, Reid RC (2000) Synaptic interactions between thalamic inputs to simple  
1229 cells in cat visual cortex. *J Neurosci* 20:5461–5467.
- 1230 Wang Y, Manis PB (2005) Synaptic Transmission at the Cochlear Nucleus Endbulb Synapse  
1231 During Age-Related Hearing Loss in Mice. *J Neurophysiol*.
- 1232 Wang Y, Manis PB (2008) Short-term synaptic depression and recovery at the mature mammalian  
1233 endbulb of Held synapse in mice. *J Neurophysiol*.
- 1234 Wang Y, Markram H, Goodman PH, Berger TK, Ma J, Goldman-Rakic PS (2006) Heterogeneity  
1235 in the pyramidal network of the medial prefrontal cortex. *Nat Neurosci* 9:534–542.
- 1236 Weiler N, Wood L, Yu J, Solla SA, Shepherd GMG (2008) Top-down laminar organization of the  
1237 excitatory network in motor cortex. *Nat Neurosci*.
- 1238 Yang H, Xu-Friedman MA (2008) Relative Roles of Different Mechanisms of Depression at the  
1239 Mouse Endbulb of Held. *J Neurophysiol*.
- 1240 Yang H, Xu-Friedman MA (2009) Impact of Synaptic Depression on Spike Timing at the Endbulb  
1241 of Held. *J Neurophysiol*.
- 1242 Zucker RS, Regehr WG (2002) Short-Term Synaptic Plasticity. *Annu Rev Physiol* 64:355–405.  
1243
